# Supplementary material for: Functional Prediction of Hypothetical Proteins from Shigella flexneri and Validation of the Predicted Models by Using ROC Curve Analysis
Source: PubMed Central journal article supplement — Genomics Inform. 2018 Dec 28;16(4):e26. doi: 10.5808/GI.2018.16.4.e26 (PMC6440662; doi:10.5808/gi.2018.16.4.e26), 2018-12-28
Supplement: gi-2018-16-4-e26-suppl.pdf [file gi-2018-16-4-e26-suppl.pdf]

## SUPPLEMENTARY INFORMATION

### Functional Prediction of Hypothetical Proteins from *Shigella flexneri* and Validation of the Predicted Models by Using ROC Curve Analysis

**Md. Amran Gazi<sup>1\*</sup>, Sultan Mahmud<sup>2</sup>, Shah Mohammad Fahim<sup>1</sup>,  
Mohammad Golam Kibria<sup>2</sup>, Parag Palit<sup>1</sup>, Md. Rezaul Islam<sup>3</sup>, Humaira Rashid<sup>2</sup>,  
Subhasish Das<sup>1</sup>, Mustafa Mahfuz<sup>1</sup>, Tahmeed Ahmeed<sup>1</sup>**

<sup>1</sup>Nutrition and Clinical Services Division, International Centre for Diarrhoeal Disease Research, Bangladesh (icddr,b), Dhaka 1212, Bangladesh, <sup>2</sup>Infectious Diseases Division, International Centre for Diarrhoeal Disease Research, Bangladesh (icddr,b), Dhaka 1212, Bangladesh, <sup>3</sup>International Max Planck Research School, Grisebachstraße 5, 37077 Göttingen, Germany

**Supplementary Table 1.** Scores of conserved domain search for 674 hypothetical proteins of *Shigella flexneri* serotype 2a strain 2457T using CDD-Blast, Pfam, Hmmscan, SMART, and Scanprosite tools

| SI No. | Nucleotide ID | Accession ID_Protein | CDD Blast | Pfam | Hmmscan | SMART | Scanprosite | Percentage |
|--------|---------------|----------------------|-----------|------|---------|-------|-------------|------------|
| 1      | NC_004741.1   | WP_000414150.1       | 0         | 0    | 0       | 0     | 0           | 0          |
| 2      | NC_004741.1   | WP_000738723.1       | 1         | 1    | 1       | 1     | 0           | 80         |
| 3      | NC_004741.1   | WP_001102351.1       | 1         | 1    | 1       | 1     | 0           | 80         |
| 4      | NC_004741.1   | WP_000843568.1       | 1         | 1    | 1       | 1     | 0           | 80         |
| 5      | NC_004741.1   | WP_032155592.1       | 0         | 0    | 0       | 0     | 0           | 0          |
| 6      | NC_004741.1   | WP_011110533.1       | 1         | 1    | 1       | 1     | 0           | 80         |
| 7      | NC_004741.1   | WP_032155631.1       | 0         | 0    | 0       | 0     | 0           | 0          |
| 8      | NC_004741.1   | WP_000196533.1       | 0         | 0    | 0       | 0     | 0           | 0          |
| 9      | NC_004741.1   | WP_001255305.1       | 0         | 0    | 0       | 0     | 0           | 0          |
| 10     | NC_004741.1   | WP_001303790.1       | 0         | 0    | 0       | 0     | 0           | 0          |
| 11     | NC_004741.1   | WP_000464383.1       | 1         | 0    | 0       | 0     | 0           | 20         |
| 12     | NC_004741.1   | WP_032155552.1       | 0         | 0    | 0       | 0     | 0           | 0          |
| 13     | NC_004741.1   | WP_005053505.1       | 1         | 1    | 1       | 1     | 0           | 80         |
| 14     | NC_004741.1   | WP_005094211.1       | 1         | 1    | 1       | 1     | 0           | 80         |
| 15     | NC_004741.1   | WP_001347263.1       | 0         | 0    | 0       | 0     | 0           | 0          |
| 16     | NC_004741.1   | WP_000964241.1       | 1         | 1    | 1       | 1     | 0           | 80         |
| 17     | NC_004741.1   | WP_000272188.1       | 1         | 1    | 1       | 1     | 0           | 80         |
| 18     | NC_004741.1   | WP_000417058.1       | 1         | 1    | 1       | 1     | 0           | 80         |
| 19     | NC_004741.1   | WP_005053355.1       | 1         | 1    | 1       | 1     | 1           | 100        |
| 20     | NC_004741.1   | WP_000402248.1       | 1         | 1    | 1       | 1     | 0           | 80         |
| 21     | NC_004741.1   | WP_024259146.1       | 0         | 0    | 0       | 0     | 0           | 0          |
| 22     | NC_004741.1   | WP_001276640.1       | 1         | 1    | 1       | 1     | 0           | 80         |
| 23     | NC_004741.1   | WP_000183806.1       | 1         | 1    | 1       | 1     | 0           | 80         |
| 24     | NC_004741.1   | WP_000343116.1       | 0         | 0    | 0       | 0     | 0           | 0          |

|    |             |                |   |   |   |   |   |     |
|----|-------------|----------------|---|---|---|---|---|-----|
| 25 | NC_004741.1 | WP_000192453.1 | 1 | 1 | 1 | 1 | 0 | 80  |
| 26 | NC_004741.1 | WP_005053303.1 | 0 | 0 | 0 | 0 | 0 | 0   |
| 27 | NC_004741.1 | WP_000627639.1 | 1 | 1 | 1 | 1 | 0 | 80  |
| 28 | NC_004741.1 | WP_032333103.1 | 0 | 0 | 0 | 0 | 0 | 0   |
| 29 | NC_004741.1 | WP_001191885.1 | 0 | 0 | 0 | 0 | 0 | 0   |
| 30 | NC_004741.1 | WP_000092054.1 | 1 | 1 | 1 | 1 | 1 | 100 |
| 31 | NC_004741.1 | WP_001110751.1 | 0 | 0 | 0 | 0 | 0 | 0   |
| 32 | NC_004741.1 | WP_005053269.1 | 0 | 0 | 0 | 0 | 0 | 0   |
| 33 | NC_004741.1 | WP_000556489.1 | 0 | 0 | 0 | 0 | 0 | 0   |
| 34 | NC_004741.1 | WP_000003122.1 | 0 | 0 | 0 | 1 | 0 | 20  |
| 35 | NC_004741.1 | WP_001102097.1 | 1 | 1 | 1 | 1 | 0 | 80  |
| 36 | NC_004741.1 | WP_001201712.1 | 0 | 0 | 0 | 0 | 0 | 0   |
| 37 | NC_004741.1 | WP_000667623.1 | 0 | 0 | 0 | 0 | 0 | 0   |
| 38 | NC_004741.1 | WP_000343515.1 | 1 | 0 | 0 | 0 | 0 | 20  |
| 39 | NC_004741.1 | WP_005100645.1 | 1 | 1 | 1 | 1 | 1 | 80  |
| 40 | NC_004741.1 | WP_000554647.1 | 0 | 0 | 0 | 0 | 0 | 0   |
| 41 | NC_004741.1 | WP_005060548.1 | 0 | 0 | 0 | 0 | 0 | 0   |
| 42 | NC_004741.1 | WP_001142439.1 | 1 | 1 | 1 | 1 | 0 | 80  |
| 43 | NC_004741.1 | WP_032155747.1 | 0 | 0 | 0 | 0 | 0 | 0   |
| 44 | NC_004741.1 | WP_000941942.1 | 1 | 1 | 1 | 1 | 0 | 80  |
| 45 | NC_004741.1 | WP_000942006.1 | 1 | 1 | 1 | 1 | 0 | 80  |
| 46 | NC_004741.1 | WP_000194195.1 | 1 | 0 | 0 | 0 | 0 | 20  |
| 47 | NC_004741.1 | WP_001326928.1 | 0 | 1 | 0 | 1 | 0 | 40  |
| 48 | NC_004741.1 | WP_001382892.1 | 1 | 1 | 1 | 1 | 1 | 100 |
| 49 | NC_004741.1 | WP_000645013.1 | 0 | 0 | 0 | 0 | 0 | 0   |
| 50 | NC_004741.1 | WP_005060811.1 | 1 | 1 | 1 | 1 | 0 | 80  |
| 51 | NC_004741.1 | WP_005053055.1 | 0 | 0 | 0 | 0 | 0 | 0   |
| 52 | NC_004741.1 | WP_005053036.1 | 1 | 1 | 1 | 1 | 1 | 100 |

|    |             |                |   |   |   |   |   |     |
|----|-------------|----------------|---|---|---|---|---|-----|
| 53 | NC_004741.1 | WP_001177122.1 | 0 | 0 | 0 | 0 | 0 | 0   |
| 54 | NC_004741.1 | WP_000680312.1 | 1 | 1 | 1 | 1 | 0 | 80  |
| 55 | NC_004741.1 | WP_005053020.1 | 1 | 1 | 1 | 1 | 0 | 80  |
| 56 | NC_004741.1 | WP_000779831.1 | 1 | 1 | 1 | 1 | 1 | 100 |
| 57 | NC_004741.1 | WP_000136192.1 | 1 | 1 | 1 | 1 | 0 | 80  |
| 58 | NC_004741.1 | WP_032140245.1 | 0 | 1 | 0 | 1 | 0 | 40  |
| 59 | NC_004741.1 | WP_001188905.1 | 1 | 1 | 1 | 1 | 0 | 80  |
| 60 | NC_004741.1 | WP_000970323.1 | 1 | 1 | 1 | 1 | 0 | 80  |
| 61 | NC_004741.1 | WP_000701358.1 | 1 | 1 | 1 | 1 | 0 | 80  |
| 62 | NC_004741.1 | WP_001224555.1 | 1 | 1 | 1 | 1 | 0 | 80  |
| 63 | NC_004741.1 | WP_000752567.1 | 1 | 1 | 1 | 1 | 0 | 80  |
| 64 | NC_004741.1 | WP_000360957.1 | 1 | 1 | 1 | 1 | 0 | 80  |
| 65 | NC_004741.1 | WP_064193753.1 | 0 | 0 | 0 | 0 | 0 | 0   |
| 66 | NC_004741.1 | WP_000460431.1 | 1 | 1 | 1 | 1 | 0 | 80  |
| 67 | NC_004741.1 | WP_000283754.1 | 1 | 1 | 1 | 1 | 0 | 80  |
| 68 | NC_004741.1 | WP_000287805.1 | 1 | 0 | 0 | 0 | 0 | 20  |
| 69 | NC_004741.1 | WP_001301130.1 | 0 | 0 | 0 | 0 | 0 | 0   |
| 70 | NC_004741.1 | WP_005083189.1 | 0 | 0 | 0 | 0 | 0 | 0   |
| 71 | NC_004741.1 | WP_001303843.1 | 0 | 0 | 0 | 0 | 0 | 0   |
| 72 | NC_004741.1 | WP_005049395.1 | 0 | 0 | 0 | 0 | 0 | 0   |
| 73 | NC_004741.1 | WP_005083246.1 | 0 | 0 | 0 | 0 | 0 | 0   |
| 74 | NC_004741.1 | WP_001188346.1 | 1 | 1 | 1 | 1 | 0 | 80  |
| 75 | NC_004741.1 | WP_001053303.1 | 1 | 1 | 1 | 1 | 0 | 80  |
| 76 | NC_004741.1 | WP_000807562.1 | 1 | 1 | 1 | 1 | 0 | 80  |
| 77 | NC_004741.1 | WP_025715253.1 | 0 | 0 | 0 | 0 | 0 | 0   |
| 78 | NC_004741.1 | WP_000405563.1 | 1 | 1 | 1 | 1 | 0 | 80  |
| 79 | NC_004741.1 | WP_001325427.1 | 0 | 0 | 0 | 0 | 0 | 0   |
| 80 | NC_004741.1 | WP_011110552.1 | 1 | 1 | 1 | 1 | 1 | 100 |

|     |             |                |   |   |   |   |   |     |
|-----|-------------|----------------|---|---|---|---|---|-----|
| 81  | NC_004741.1 | WP_000153125.1 | 1 | 1 | 1 | 1 | 0 | 80  |
| 82  | NC_004741.1 | WP_000232643.1 | 1 | 1 | 1 | 1 | 0 | 80  |
| 83  | NC_004741.1 | WP_005049464.1 | 0 | 0 | 0 | 1 | 0 | 20  |
| 84  | NC_004741.1 | WP_001030938.1 | 1 | 1 | 1 | 1 | 0 | 80  |
| 85  | NC_004741.1 | WP_000367140.1 | 1 | 1 | 1 | 1 | 0 | 80  |
| 86  | NC_004741.1 | WP_000578172.1 | 1 | 1 | 1 | 1 | 0 | 80  |
| 87  | NC_004741.1 | WP_001044870.1 | 1 | 1 | 1 | 1 | 0 | 80  |
| 88  | NC_004741.1 | WP_001269672.1 | 1 | 1 | 1 | 1 | 1 | 100 |
| 89  | NC_004741.1 | WP_000850550.1 | 1 | 1 | 1 | 1 | 0 | 80  |
| 90  | NC_004741.1 | WP_000073523.1 | 0 | 0 | 0 | 0 | 0 | 0   |
| 91  | NC_004741.1 | WP_005049496.1 | 0 | 0 | 0 | 0 | 0 | 0   |
| 92  | NC_004741.1 | WP_000627468.1 | 1 | 1 | 1 | 1 | 0 | 80  |
| 93  | NC_004741.1 | WP_005060669.1 | 0 | 0 | 0 | 0 | 0 | 0   |
| 94  | NC_004741.1 | WP_000873153.1 | 1 | 1 | 1 | 1 | 0 | 80  |
| 95  | NC_004741.1 | WP_000113500.1 | 1 | 1 | 1 | 1 | 0 | 80  |
| 96  | NC_004741.1 | WP_005020049.1 | 0 | 0 | 0 | 0 | 0 | 0   |
| 97  | NC_004741.1 | WP_005098291.1 | 0 | 0 | 0 | 0 | 0 | 0   |
| 98  | NC_004741.1 | WP_001108106.1 | 0 | 0 | 0 | 0 | 0 | 0   |
| 99  | NC_004741.1 | WP_000454800.1 | 1 | 1 | 1 | 1 | 0 | 80  |
| 100 | NC_004741.1 | WP_047199943.1 | 1 | 1 | 1 | 1 | 0 | 80  |
| 101 | NC_004741.1 | WP_001247854.1 | 1 | 1 | 1 | 1 | 1 | 100 |
| 102 | NC_004741.1 | WP_001343960.1 | 0 | 0 | 0 | 0 | 0 | 0   |
| 103 | NC_004741.1 | WP_005053437.1 | 0 | 0 | 0 | 0 | 0 | 0   |
| 104 | NC_004741.1 | WP_000551132.1 | 1 | 1 | 1 | 1 | 0 | 80  |
| 105 | NC_004741.1 | WP_000266134.1 | 1 | 0 | 0 | 0 | 0 | 20  |
| 106 | NC_004741.1 | WP_005048534.1 | 1 | 1 | 1 | 1 | 0 | 80  |
| 107 | NC_004741.1 | WP_000446914.1 | 1 | 1 | 1 | 1 | 0 | 80  |
| 108 | NC_004741.1 | WP_000871982.1 | 1 | 1 | 1 | 1 | 0 | 80  |

|     |             |                |   |   |   |   |   |     |
|-----|-------------|----------------|---|---|---|---|---|-----|
| 109 | NC_004741.1 | WP_000070107.1 | 1 | 1 | 1 | 1 | 1 | 100 |
| 110 | NC_004741.1 | WP_001336078.1 | 0 | 1 | 0 | 1 | 0 | 40  |
| 111 | NC_004741.1 | WP_005048500.1 | 1 | 1 | 1 | 1 | 0 | 80  |
| 112 | NC_004741.1 | WP_000849301.1 | 1 | 1 | 1 | 1 | 0 | 80  |
| 113 | NC_004741.1 | WP_000710620.1 | 1 | 1 | 1 | 1 | 0 | 80  |
| 114 | NC_004741.1 | WP_000188784.1 | 0 | 0 | 0 | 0 | 0 | 0   |
| 115 | NC_004741.1 | WP_000168813.1 | 1 | 1 | 1 | 1 | 0 | 80  |
| 116 | NC_004741.1 | WP_001295900.1 | 0 | 0 | 0 | 0 | 0 | 0   |
| 117 | NC_004741.1 | WP_000681108.1 | 1 | 1 | 1 | 1 | 0 | 80  |
| 118 | NC_004741.1 | WP_001201557.1 | 1 | 1 | 1 | 1 | 0 | 80  |
| 119 | NC_004741.1 | WP_000389260.1 | 1 | 1 | 1 | 1 | 0 | 80  |
| 120 | NC_004741.1 | WP_001303862.1 | 0 | 0 | 0 | 0 | 0 | 0   |
| 121 | NC_004741.1 | WP_001160722.1 | 1 | 1 | 1 | 1 | 0 | 80  |
| 122 | NC_004741.1 | WP_032155760.1 | 0 | 0 | 0 | 0 | 0 | 0   |
| 123 | NC_004741.1 | WP_000687442.1 | 0 | 0 | 0 | 0 | 0 | 0   |
| 124 | NC_004741.1 | WP_029716636.1 | 1 | 1 | 1 | 1 | 0 | 80  |
| 125 | NC_004741.1 | WP_005048249.1 | 0 | 0 | 1 | 0 | 0 | 20  |
| 126 | NC_004741.1 | WP_001118167.1 | 1 | 1 | 1 | 1 | 0 | 80  |
| 127 | NC_004741.1 | WP_000702036.1 | 1 | 1 | 1 | 1 | 0 | 80  |
| 128 | NC_004741.1 | WP_001091985.1 | 1 | 1 | 1 | 1 | 0 | 80  |
| 129 | NC_004741.1 | WP_001005968.1 | 0 | 0 | 0 | 0 | 0 | 0   |
| 130 | NC_004741.1 | WP_005051132.1 | 1 | 0 | 0 | 0 | 0 | 20  |
| 131 | NC_004741.1 | WP_005061679.1 | 1 | 1 | 1 | 1 | 0 | 80  |
| 132 | NC_004741.1 | WP_001039888.1 | 1 | 0 | 1 | 0 | 0 | 40  |
| 133 | NC_004741.1 | WP_000723623.1 | 1 | 1 | 1 | 1 | 0 | 80  |
| 134 | NC_004741.1 | WP_000959226.1 | 0 | 0 | 0 | 0 | 0 | 0   |
| 135 | NC_004741.1 | WP_000350058.1 | 1 | 1 | 1 | 1 | 0 | 80  |
| 136 | NC_004741.1 | WP_000196607.1 | 0 | 0 | 0 | 0 | 0 | 0   |

|     |             |                |   |   |   |   |   |     |
|-----|-------------|----------------|---|---|---|---|---|-----|
| 137 | NC_004741.1 | WP_000235193.1 | 1 | 0 | 0 | 0 | 0 | 20  |
| 138 | NC_004741.1 | WP_000224274.1 | 1 | 1 | 1 | 1 | 1 | 100 |
| 139 | NC_004741.1 | WP_001261235.1 | 1 | 1 | 1 | 1 | 0 | 80  |
| 140 | NC_004741.1 | WP_000847791.1 | 1 | 1 | 1 | 1 | 0 | 80  |
| 141 | NC_004741.1 | WP_001301416.1 | 0 | 0 | 0 | 0 | 0 | 0   |
| 142 | NC_004741.1 | WP_001038092.1 | 1 | 1 | 1 | 1 | 0 | 80  |
| 143 | NC_004741.1 | WP_005083611.1 | 0 | 0 | 0 |   | 0 | 0   |
| 144 | NC_004741.1 | WP_000505101.1 | 1 | 0 | 0 | 0 | 0 | 20  |
| 145 | NC_004741.1 | WP_000535353.1 | 1 | 0 | 0 | 0 | 0 | 20  |
| 146 | NC_004741.1 | WP_001143120.1 | 1 | 1 | 1 | 1 | 0 | 80  |
| 147 | NC_004741.1 | WP_000124106.1 | 0 | 0 | 0 | 0 | 0 | 0   |
| 148 | NC_004741.1 | WP_000611853.1 | 0 | 0 | 0 | 0 | 0 | 0   |
| 149 | NC_004741.1 | WP_001297187.1 | 1 | 1 | 1 | 1 | 0 | 80  |
| 150 | NC_004741.1 | WP_032155907.1 | 0 | 0 | 0 | 0 | 0 | 0   |
| 151 | NC_004741.1 | WP_001111218.1 | 0 | 0 | 0 | 0 | 0 | 0   |
| 152 | NC_004741.1 | WP_005047366.1 | 0 | 0 |   | 0 | 0 | 0   |
| 153 | NC_004741.1 | WP_000818776.1 | 0 | 0 | 0 | 0 | 0 | 0   |
| 154 | NC_004741.1 | WP_000749269.1 | 1 | 1 | 1 | 1 | 1 | 100 |
| 155 | NC_004741.1 | WP_000877111.1 | 1 | 1 | 1 | 1 | 0 | 80  |
| 156 | NC_004741.1 | WP_001295962.1 | 1 | 1 | 1 | 1 | 0 | 80  |
| 157 | NC_004741.1 | WP_000587933.1 | 1 | 1 | 1 | 1 | 0 | 80  |
| 158 | NC_004741.1 | WP_001043459.1 | 1 | 1 | 1 | 1 | 0 | 80  |
| 159 | NC_004741.1 | WP_032155646.1 | 0 | 0 | 0 | 0 | 0 | 0   |
| 160 | NC_004741.1 | WP_000103622.1 | 0 | 0 | 0 | 0 | 0 | 0   |
| 161 | NC_004741.1 | WP_005005155.1 | 0 | 0 | 0 | 0 | 0 | 0   |
| 162 | NC_004741.1 | WP_001204964.1 | 0 | 0 | 0 | 0 | 1 | 20  |
| 163 | NC_004741.1 | WP_000770157.1 | 1 | 1 | 1 | 1 | 0 | 80  |
| 164 | NC_004741.1 | WP_000557473.1 | 0 | 0 | 0 | 0 | 0 | 0   |

|     |             |                |   |   |   |   |   |     |
|-----|-------------|----------------|---|---|---|---|---|-----|
| 165 | NC_004741.1 | WP_001294167.1 | 0 | 0 | 0 | 0 | 0 | 0   |
| 166 | NC_004741.1 | WP_001132078.1 | 0 | 0 | 0 | 0 | 0 | 0   |
| 167 | NC_004741.1 | WP_000267598.1 | 1 | 1 | 1 | 1 | 0 | 80  |
| 168 | NC_004741.1 | WP_000134107.1 | 1 | 1 | 1 | 1 | 0 | 80  |
| 169 | NC_004741.1 | WP_001005703.1 | 0 | 0 | 0 | 0 | 0 | 0   |
| 170 | NC_004741.1 | WP_029716858.1 | 1 | 1 | 1 | 1 | 0 | 80  |
| 171 | NC_004741.1 | WP_000133415.1 | 0 | 0 | 0 | 0 | 0 | 0   |
| 172 | NC_004741.1 | WP_005047957.1 | 0 | 0 | 0 | 0 | 0 | 0   |
| 173 | NC_004741.1 | WP_032155828.1 | 0 | 0 | 0 | 0 | 0 | 0   |
| 174 | NC_004741.1 | WP_005047951.1 | 0 | 0 | 0 | 0 | 0 | 0   |
| 175 | NC_004741.1 | WP_001295611.1 | 1 | 1 | 1 | 1 | 0 | 80  |
| 176 | NC_004741.1 | WP_000122462.1 | 0 | 0 | 0 | 0 | 0 | 0   |
| 177 | NC_004741.1 | WP_005061990.1 | 0 | 0 | 0 | 0 | 0 | 0   |
| 178 | NC_004741.1 | WP_001125713.1 | 1 | 1 | 1 | 1 | 1 | 100 |
| 179 | NC_004741.1 | WP_000807626.1 | 1 | 1 | 1 | 1 | 0 | 80  |
| 180 | NC_004741.1 | WP_011069340.1 | 0 | 0 | 0 | 0 | 0 | 0   |
| 181 | NC_004741.1 | WP_000280742.1 | 0 | 0 | 0 | 0 | 0 | 0   |
| 182 | NC_004741.1 | WP_001257042.1 | 1 | 1 | 1 | 1 | 0 | 80  |
| 183 | NC_004741.1 | WP_000950192.1 | 1 | 1 | 1 | 1 | 0 | 80  |
| 184 | NC_004741.1 | WP_001169669.1 | 1 | 1 | 1 | 1 | 0 | 80  |
| 185 | NC_004741.1 | WP_000069487.1 | 0 | 0 | 0 | 0 | 0 | 0   |
| 186 | NC_004741.1 | WP_005105319.1 | 1 | 1 | 1 | 1 | 0 | 80  |
| 187 | NC_004741.1 | WP_001303937.1 | 0 | 0 | 0 | 0 | 0 | 0   |
| 188 | NC_004741.1 | WP_000967595.1 | 1 | 1 | 1 | 1 | 0 | 80  |
| 189 | NC_004741.1 | WP_000028536.1 | 1 | 1 | 1 | 1 | 0 | 80  |
| 190 | NC_004741.1 | WP_000807659.1 | 1 | 1 | 1 | 1 | 0 | 80  |
| 191 | NC_004741.1 | WP_001303289.1 | 0 | 0 | 0 | 0 | 0 | 0   |
| 192 | NC_004741.1 | WP_001031530.1 | 1 | 1 | 1 | 1 | 0 | 80  |



|     |             |                |   |   |   |   |   |     |
|-----|-------------|----------------|---|---|---|---|---|-----|
| 193 | NC_004741.1 | WP_014640285.1 | 0 | 0 | 0 | 0 | 0 | 0   |
| 194 | NC_004741.1 | WP_000233043.1 | 0 | 0 | 0 | 0 | 0 | 0   |
| 195 | NC_004741.1 | WP_000616081.1 | 0 | 0 | 0 | 0 | 0 | 0   |
| 196 | NC_004741.1 | WP_001288369.1 | 1 | 0 | 0 | 0 | 0 | 0   |
| 197 | NC_004741.1 | WP_001331106.1 | 1 | 1 | 1 | 1 | 0 | 80  |
| 198 | NC_004741.1 | WP_023636694.1 | 0 | 0 | 0 | 0 | 1 | 20  |
| 199 | NC_004741.1 | WP_000825769.1 | 1 | 1 | 1 | 1 | 0 | 80  |
| 200 | NC_004741.1 | WP_032155686.1 | 1 | 0 | 0 | 0 | 0 | 20  |
| 201 | NC_004741.1 | WP_000124119.1 | 0 | 0 | 0 | 0 | 0 | 0   |
| 202 | NC_004741.1 | WP_001296046.1 | 0 | 0 | 0 | 0 | 0 | 0   |
| 203 | NC_004741.1 | WP_005047705.1 | 1 | 0 | 0 | 0 | 0 | 20  |
| 204 | NC_004741.1 | WP_005047713.1 | 1 | 1 | 1 | 1 | 0 | 80  |
| 205 | NC_004741.1 | WP_023517638.1 | 1 | 1 | 1 | 1 | 0 | 80  |
| 206 | NC_004741.1 | WP_011069401.1 | 1 | 1 | 1 | 1 | 0 | 80  |
| 207 | NC_004741.1 | WP_000431885.1 | 1 | 1 | 1 | 1 | 0 | 80  |
| 208 | NC_004741.1 | WP_011069399.1 | 0 | 0 | 0 | 0 | 0 | 0   |
| 209 | NC_004741.1 | WP_001296778.1 | 0 | 0 | 0 | 0 | 0 | 80  |
| 210 | NC_004741.1 | WP_001077956.1 | 0 | 0 | 0 | 0 | 0 | 0   |
| 211 | NC_004741.1 | WP_000554382.1 | 1 | 0 | 0 | 0 | 0 | 20  |
| 212 | NC_004741.1 | WP_005049838.1 | 1 | 1 | 1 | 1 | 0 | 80  |
| 213 | NC_004741.1 | WP_001295499.1 | 1 | 1 | 1 | 1 | 0 | 80  |
| 214 | NC_004741.1 | WP_001043881.1 | 1 | 1 | 1 | 1 | 1 | 100 |
| 215 | NC_004741.1 | WP_001006860.1 | 1 | 1 | 1 | 1 | 0 | 80  |
| 216 | NC_004741.1 | WP_032155836.1 | 0 | 0 | 0 | 0 | 0 | 0   |
| 217 | NC_004741.1 | WP_000156246.1 | 1 | 1 | 1 | 1 | 0 | 80  |
| 218 | NC_004741.1 | WP_001306763.1 | 0 | 0 | 0 | 0 | 0 | 0   |
| 219 | NC_004741.1 | WP_001295493.1 | 1 | 1 | 1 | 1 | 1 | 100 |
| 220 | NC_004741.1 | WP_032155854.1 | 0 | 0 | 0 | 0 | 1 | 20  |

|     |             |                |   |   |   |   |   |     |
|-----|-------------|----------------|---|---|---|---|---|-----|
| 221 | NC_004741.1 | WP_000691930.1 | 1 | 1 | 1 | 1 | 1 | 100 |
| 222 | NC_004741.1 | WP_005126892.1 | 0 | 0 | 0 | 0 | 0 | 0   |
| 223 | NC_004741.1 | WP_000138039.1 | 1 | 1 | 1 | 1 | 0 | 80  |
| 224 | NC_004741.1 | WP_001046790.1 | 1 | 1 | 1 | 1 | 0 | 80  |
| 225 | NC_004741.1 | WP_001453023.1 | 0 | 0 | 0 | 0 | 0 | 0   |
| 226 | NC_004741.1 | WP_012602004.1 | 0 | 0 | 0 | 0 | 0 | 0   |
| 227 | NC_004741.1 | WP_000756955.1 | 1 | 1 | 1 | 1 | 0 | 80  |
| 228 | NC_004741.1 | WP_000085238.1 | 1 | 1 | 1 | 1 | 0 | 80  |
| 229 | NC_004741.1 | WP_001215295.1 | 1 | 0 | 0 | 0 | 0 | 20  |
| 230 | NC_004741.1 | WP_000077934.1 | 0 | 0 | 0 | 0 | 1 | 20  |
| 231 | NC_004741.1 | WP_032145487.1 | 0 | 1 | 0 | 1 | 0 | 40  |
| 232 | NC_004741.1 | WP_001297653.1 | 1 | 1 | 1 | 1 | 0 | 80  |
| 233 | NC_004741.1 | WP_000146138.1 | 1 | 1 | 1 | 1 | 0 | 80  |
| 234 | NC_004741.1 | WP_001142445.1 | 0 | 0 | 0 | 0 | 0 | 0   |
| 235 | NC_004741.1 | WP_005050031.1 | 1 | 1 | 1 | 1 | 0 | 80  |
| 236 | NC_004741.1 | WP_042003723.1 | 0 | 0 | 0 | 0 | 0 | 0   |
| 237 | NC_004741.1 | WP_000398613.1 | 0 | 0 | 0 | 0 | 0 | 0   |
| 238 | NC_004741.1 | WP_005062520.1 | 0 | 0 | 0 | 0 | 0 | 0   |
| 239 | NC_004741.1 | WP_000726666.1 | 1 | 1 | 1 | 1 | 0 | 80  |
| 240 | NC_004741.1 | WP_000874243.1 | 1 | 1 | 1 | 1 | 0 | 80  |
| 241 | NC_004741.1 | WP_045177689.1 | 0 | 0 | 0 | 0 | 0 | 0   |
| 242 | NC_004741.1 | WP_001265249.1 | 1 | 1 | 1 | 1 | 0 | 80  |
| 243 | NC_004741.1 | WP_000980987.1 | 0 | 0 | 0 | 0 | 0 | 0   |
| 244 | NC_004741.1 | WP_000214712.1 | 1 | 1 | 1 | 1 | 0 | 80  |
| 245 | NC_004741.1 | WP_001024558.1 | 1 | 1 | 1 | 1 | 0 | 80  |
| 246 | NC_004741.1 | WP_000901367.1 | 0 | 0 | 0 | 0 | 0 | 0   |
| 247 | NC_004741.1 | WP_000258546.1 | 0 | 0 | 0 | 0 | 0 | 0   |
| 248 | NC_004741.1 | WP_000957853.1 | 0 | 0 | 0 | 0 | 0 | 0   |

|     |             |                |   |   |   |   |   |     |
|-----|-------------|----------------|---|---|---|---|---|-----|
| 249 | NC_004741.1 | WP_005050130.1 | 1 | 1 | 1 | 1 | 0 | 80  |
| 250 | NC_004741.1 | WP_001295395.1 | 1 | 1 | 1 | 1 | 0 | 80  |
| 251 | NC_004741.1 | WP_000705197.1 | 1 | 1 | 1 | 1 | 0 | 80  |
| 252 | NC_004741.1 | WP_000234660.1 | 0 | 0 | 0 | 0 | 0 | 0   |
| 253 | NC_004741.1 | WP_000520318.1 | 0 | 0 | 1 | 1 | 0 | 40  |
| 254 | NC_004741.1 | WP_000207512.1 | 0 | 0 | 0 | 0 | 0 | 0   |
| 255 | NC_004741.1 | WP_000971490.1 | 1 | 0 | 1 | 0 | 0 | 40  |
| 256 | NC_004741.1 | WP_001240758.1 | 0 | 0 | 0 | 0 | 0 | 0   |
| 257 | NC_004741.1 | WP_000199921.1 | 0 | 0 | 0 | 0 | 0 | 0   |
| 258 | NC_004741.1 | WP_001091024.1 | 0 | 0 | 0 | 0 | 0 | 0   |
| 259 | NC_004741.1 | WP_000113584.1 | 0 | 0 | 0 | 0 | 0 | 0   |
| 260 | NC_004741.1 | WP_000091718.1 | 0 | 0 | 0 | 0 | 0 | 0   |
| 261 | NC_004741.1 | WP_001249851.1 | 0 | 0 | 0 | 0 | 0 | 0   |
| 262 | NC_004741.1 | WP_000233090.1 | 1 | 0 | 0 | 0 | 0 | 20  |
| 263 | NC_004741.1 | WP_000769323.1 | 1 | 1 | 1 | 1 | 0 | 80  |
| 264 | NC_004741.1 | WP_000524868.1 | 1 | 1 | 1 | 1 | 0 | 80  |
| 265 | NC_004741.1 | WP_000597196.1 | 1 | 1 | 1 | 1 | 1 | 100 |
| 266 | NC_004741.1 | WP_032155892.1 | 1 | 0 | 0 | 0 | 0 | 20  |
| 267 | NC_004741.1 | WP_000534313.1 | 1 | 1 | 1 | 1 | 0 | 80  |
| 268 | NC_004741.1 | WP_000212657.1 | 1 | 1 | 1 | 1 | 0 | 80  |
| 269 | NC_004741.1 | WP_000587595.1 | 1 | 0 | 0 | 0 | 0 | 20  |
| 270 | NC_004741.1 | WP_001344535.1 | 1 | 0 | 0 | 0 | 0 | 20  |
| 271 | NC_004741.1 | WP_000528342.1 | 1 | 1 | 1 | 1 | 0 | 80  |
| 272 | NC_004741.1 | WP_001296104.1 | 1 | 1 | 1 | 1 | 0 | 80  |
| 273 | NC_004741.1 | WP_000248636.1 | 1 | 1 | 1 | 1 | 1 | 100 |
| 274 | NC_004741.1 | WP_001301287.1 | 1 | 1 | 1 | 1 | 0 | 80  |
| 275 | NC_004741.1 | WP_032155900.1 | 0 | 0 | 0 | 0 | 0 | 0   |
| 276 | NC_004741.1 | WP_000627104.1 | 1 | 0 | 0 | 0 | 1 | 40  |

|     |             |                |   |   |   |   |   |     |
|-----|-------------|----------------|---|---|---|---|---|-----|
| 277 | NC_004741.1 | WP_000124121.1 | 0 | 0 | 1 | 0 | 0 | 20  |
| 278 | NC_004741.1 | WP_000018633.1 | 1 | 1 | 1 | 1 | 0 | 80  |
| 279 | NC_004741.1 | WP_012817775.1 | 0 | 0 | 0 | 0 | 0 | 0   |
| 280 | NC_004741.1 | WP_032155659.1 | 0 | 0 | 0 | 0 | 0 | 0   |
| 281 | NC_004741.1 | WP_001380520.1 | 1 | 1 | 1 | 1 | 0 | 80  |
| 282 | NC_004741.1 | WP_000879272.1 | 1 | 0 | 0 | 0 | 0 | 20  |
| 283 | NC_004741.1 | WP_000168747.1 | 1 | 1 | 1 | 1 | 0 | 80  |
| 284 | NC_004741.1 | WP_000275187.1 | 0 | 0 | 0 | 0 | 0 | 0   |
| 285 | NC_004741.1 | WP_005047608.1 | 1 | 1 | 1 | 1 | 0 | 80  |
| 286 | NC_004741.1 | WP_000155622.1 | 0 | 0 | 0 | 0 | 0 | 0   |
| 287 | NC_004741.1 | WP_001024930.1 | 1 | 1 | 1 | 1 | 0 | 80  |
| 288 | NC_004741.1 | WP_005084198.1 | 0 | 0 | 0 | 0 | 0 | 0   |
| 289 | NC_004741.1 | WP_001039885.1 | 1 | 0 | 1 | 0 | 0 | 40  |
| 290 | NC_004741.1 | WP_000930145.1 | 1 | 1 | 1 | 1 | 0 | 80  |
| 291 | NC_004741.1 | WP_000009987.1 | 0 | 0 | 0 | 0 | 0 | 0   |
| 292 | NC_004741.1 | WP_000245528.1 | 1 | 1 | 1 | 1 | 0 | 80  |
| 293 | NC_004741.1 | WP_005049830.1 | 1 | 0 | 0 | 0 | 0 | 20  |
| 294 | NC_004741.1 | WP_001173294.1 | 1 | 1 | 1 | 0 | 0 | 60  |
| 295 | NC_004741.1 | WP_000930141.1 | 1 | 1 | 1 | 1 | 0 | 80  |
| 296 | NC_004741.1 | WP_001007942.1 | 0 | 0 | 0 | 0 | 0 | 0   |
| 297 | NC_004741.1 | WP_000082749.1 | 1 | 1 | 1 | 1 | 0 | 80  |
| 298 | NC_004741.1 | WP_005048633.1 | 0 | 0 | 0 | 0 | 0 | 0   |
| 299 | NC_004741.1 | WP_001028876.1 | 0 | 0 | 0 | 0 | 0 | 0   |
| 300 | NC_004741.1 | WP_000755956.1 | 1 | 1 | 1 | 1 | 1 | 100 |
| 301 | NC_004741.1 | WP_001099210.1 | 1 | 1 | 1 | 1 | 0 | 80  |
| 302 | NC_004741.1 | WP_000586688.1 | 1 | 0 | 0 | 0 | 0 | 20  |
| 303 | NC_004741.1 | WP_000457719.1 | 1 | 1 | 1 | 1 | 0 | 80  |
| 304 | NC_004741.1 | WP_001030133.1 | 0 | 0 | 0 | 0 | 0 | 0   |

|     |             |                |   |   |   |   |   |     |
|-----|-------------|----------------|---|---|---|---|---|-----|
| 305 | NC_004741.1 | WP_005063152.1 | 1 | 1 | 1 | 1 | 0 | 80  |
| 306 | NC_004741.1 | WP_000455174.1 | 1 | 1 | 1 | 1 | 0 | 80  |
| 307 | NC_004741.1 | WP_001103659.1 | 1 | 0 | 0 | 0 | 0 | 20  |
| 308 | NC_004741.1 | WP_042791229.1 | 0 | 0 | 0 | 0 | 0 | 0   |
| 309 | NC_004741.1 | WP_000082120.1 | 1 | 1 | 1 | 1 | 0 | 80  |
| 310 | NC_004741.1 | WP_001297814.1 | 0 | 0 | 0 | 0 | 0 | 0   |
| 311 | NC_004741.1 | WP_001237866.1 | 1 | 1 | 1 | 1 | 1 | 100 |
| 312 | NC_004741.1 | WP_000377229.1 | 1 | 1 | 1 | 1 | 0 | 80  |
| 313 | NC_004741.1 | WP_032155628.1 | 0 | 0 | 0 | 0 | 0 | 0   |
| 314 | NC_004741.1 | WP_000106474.1 | 1 | 1 | 1 | 1 | 0 | 80  |
| 315 | NC_004741.1 | WP_000118898.1 | 1 | 1 | 1 | 1 | 0 | 80  |
| 316 | NC_004741.1 | WP_000230645.1 | 0 | 0 | 0 | 0 | 0 | 0   |
| 317 | NC_004741.1 | WP_024259260.1 | 0 | 0 | 0 | 0 | 0 | 0   |
| 318 | NC_004741.1 | WP_005048789.1 | 1 | 1 | 1 | 1 | 0 | 80  |
| 319 | NC_004741.1 | WP_000431460.1 | 1 | 0 | 0 | 0 | 0 | 20  |
| 320 | NC_004741.1 | WP_032155863.1 | 1 | 0 | 0 | 0 | 0 | 20  |
| 321 | NC_004741.1 | WP_032155819.1 | 0 | 0 | 0 | 0 | 0 | 0   |
| 322 | NC_004741.1 | WP_001039899.1 | 0 | 0 | 0 | 0 | 0 | 0   |
| 323 | NC_004741.1 | WP_064716611.1 | 1 | 1 | 1 | 1 | 0 | 80  |
| 324 | NC_004741.1 | WP_000594909.1 | 0 | 0 | 0 | 0 | 1 | 20  |
| 325 | NC_004741.1 | WP_001062338.1 | 1 | 1 | 1 | 1 | 0 | 80  |
| 326 | NC_004741.1 | WP_001265248.1 | 1 | 1 | 1 | 1 | 0 | 80  |
| 327 | NC_004741.1 | WP_000152435.1 | 0 | 0 | 0 | 0 | 0 | 0   |
| 328 | NC_004741.1 | WP_032155691.1 | 1 | 0 | 0 | 0 | 0 | 20  |
| 329 | NC_004741.1 | WP_001343759.1 | 0 | 0 | 0 | 0 | 0 | 0   |
| 330 | NC_004741.1 | WP_000466572.1 | 1 | 0 | 0 | 0 | 0 | 20  |
| 331 | NC_004741.1 | WP_061440266.1 | 1 | 0 | 0 | 0 | 0 | 20  |
| 332 | NC_004741.1 | WP_001016348.1 | 1 | 1 | 1 | 1 | 0 | 80  |

|     |             |                |   |   |   |   |   |     |
|-----|-------------|----------------|---|---|---|---|---|-----|
| 333 | NC_004741.1 | WP_000450409.1 | 1 | 1 | 1 | 1 | 0 | 80  |
| 334 | NC_004741.1 | WP_005088730.1 | 0 | 0 | 1 | 0 | 0 | 20  |
| 335 | NC_004741.1 | WP_000282151.1 | 1 | 1 | 1 | 1 | 0 | 80  |
| 336 | NC_004741.1 | WP_001243860.1 | 1 | 1 | 1 | 1 | 0 | 80  |
| 337 | NC_004741.1 | WP_011110604.1 | 0 | 0 | 0 | 0 | 0 | 0   |
| 338 | NC_004741.1 | WP_011069433.1 | 0 | 0 | 0 | 0 | 0 | 0   |
| 339 | NC_004741.1 | WP_000055830.1 | 0 | 0 | 0 | 0 | 0 | 0   |
| 340 | NC_004741.1 | WP_011069434.1 | 1 | 0 | 1 | 0 | 0 | 40  |
| 341 | NC_004741.1 | WP_000454701.1 | 1 | 1 | 1 | 1 | 1 | 100 |
| 342 | NC_004741.1 | WP_000489605.1 | 1 | 0 | 0 | 0 | 0 | 20  |
| 343 | NC_004741.1 | WP_000003197.1 | 1 | 1 | 1 | 1 | 1 | 100 |
| 344 | NC_004741.1 | WP_000929408.1 | 1 | 1 | 1 | 1 | 0 | 80  |
| 345 | NC_004741.1 | WP_014532286.1 | 0 | 0 | 0 | 0 | 0 | 0   |
| 346 | NC_004741.1 | WP_001324860.1 | 0 | 0 | 0 | 0 | 1 | 20  |
| 347 | NC_004741.1 | WP_000830460.1 | 1 | 0 | 1 | 0 | 0 | 40  |
| 348 | NC_004741.1 | WP_011110605.1 | 1 | 1 | 1 | 1 | 0 | 80  |
| 349 | NC_004741.1 | WP_000261596.1 | 0 | 0 | 0 | 0 | 0 | 0   |
| 350 | NC_004741.1 | WP_005049040.1 | 0 | 0 | 0 | 0 | 0 | 0   |
| 351 | NC_004741.1 | WP_005098884.1 | 1 | 1 | 1 | 1 | 0 | 80  |
| 352 | NC_004741.1 | WP_005049034.1 | 1 | 1 | 1 | 1 | 0 | 80  |
| 353 | NC_004741.1 | WP_024259269.1 | 1 | 1 | 1 | 1 | 0 | 80  |
| 354 | NC_004741.1 | WP_000636931.1 | 0 | 0 | 0 | 0 | 0 | 0   |
| 355 | NC_004741.1 | WP_000380421.1 | 0 | 0 | 0 | 0 | 0 | 0   |
| 356 | NC_004741.1 | WP_001294399.1 | 0 | 0 | 0 | 0 | 0 | 0   |
| 357 | NC_004741.1 | WP_005049026.1 | 1 | 1 | 1 | 1 | 0 | 80  |
| 358 | NC_004741.1 | WP_001087240.1 | 1 | 0 | 1 | 0 | 1 | 60  |
| 359 | NC_004741.1 | WP_005049020.1 | 1 | 1 | 1 | 1 | 1 | 100 |
| 360 | NC_004741.1 | WP_048814497.1 | 1 | 1 | 1 | 1 | 1 | 100 |

|     |             |                |   |   |   |   |   |     |
|-----|-------------|----------------|---|---|---|---|---|-----|
| 361 | NC_004741.1 | WP_011069443.1 | 0 | 0 | 0 | 0 | 0 | 0   |
| 362 | NC_004741.1 | WP_000691708.1 | 0 | 0 | 0 | 0 | 0 | 0   |
| 363 | NC_004741.1 | WP_001295452.1 | 1 | 1 | 1 | 1 | 0 | 80  |
| 364 | NC_004741.1 | WP_032155550.1 | 0 | 0 | 0 | 0 | 0 | 0   |
| 365 | NC_004741.1 | WP_001308773.1 | 0 | 0 | 0 | 0 | 0 | 0   |
| 366 | NC_004741.1 | WP_000182053.1 | 1 | 1 | 1 | 1 | 0 | 80  |
| 367 | NC_004741.1 | WP_000202798.1 | 1 | 1 | 1 | 1 | 0 | 80  |
| 368 | NC_004741.1 | WP_001135673.1 | 1 | 1 | 1 | 1 | 0 | 80  |
| 369 | NC_004741.1 | WP_001303596.1 | 0 | 0 | 0 | 0 | 0 | 0   |
| 370 | NC_004741.1 | WP_001296837.1 | 0 | 0 | 0 | 0 | 0 | 0   |
| 371 | NC_004741.1 | WP_001225855.1 | 1 | 1 | 1 | 1 | 0 | 80  |
| 372 | NC_004741.1 | WP_001104543.1 | 1 | 1 | 1 | 1 | 0 | 80  |
| 373 | NC_004741.1 | WP_005046832.1 | 1 | 0 | 0 | 0 | 0 | 20  |
| 374 | NC_004741.1 | WP_001215763.1 | 1 | 1 | 1 | 1 | 0 | 80  |
| 375 | NC_004741.1 | WP_032083391.1 | 0 | 0 | 0 | 0 | 0 | 0   |
| 376 | NC_004741.1 | WP_000301054.1 | 1 | 1 | 1 | 1 | 1 | 100 |
| 377 | NC_004741.1 | WP_001009396.1 | 1 | 0 | 0 | 0 | 0 | 20  |
| 378 | NC_004741.1 | WP_000140529.1 | 1 | 1 | 1 | 1 | 0 | 80  |
| 379 | NC_004741.1 | WP_000070619.1 | 1 | 1 | 1 | 1 | 0 | 80  |
| 380 | NC_004741.1 | WP_001446945.1 | 1 | 1 | 1 | 1 | 0 | 80  |
| 381 | NC_004741.1 | WP_000525371.1 | 1 | 1 | 1 | 1 | 0 | 80  |
| 382 | NC_004741.1 | WP_000426116.1 | 1 | 1 | 1 | 1 | 0 | 80  |
| 383 | NC_004741.1 | WP_000106622.1 | 1 | 1 | 1 | 1 | 0 | 80  |
| 384 | NC_004741.1 | WP_001115612.1 | 0 | 0 | 0 | 0 | 0 | 0   |
| 385 | NC_004741.1 | WP_001274496.1 | 1 | 1 | 1 | 1 | 0 | 80  |
| 386 | NC_004741.1 | WP_000559763.1 | 1 | 1 | 1 | 1 | 0 | 80  |
| 387 | NC_004741.1 | WP_005070009.1 | 1 | 1 | 1 | 1 | 0 | 80  |
| 388 | NC_004741.1 | WP_000937783.1 | 0 | 0 | 0 | 0 | 0 | 0   |

|     |             |                |   |   |   |   |   |    |
|-----|-------------|----------------|---|---|---|---|---|----|
| 389 | NC_004741.1 | WP_000937210.1 | 1 | 1 | 1 | 1 | 0 | 80 |
| 390 | NC_004741.1 | WP_000825597.1 | 1 | 1 | 1 | 1 | 0 | 80 |
| 391 | NC_004741.1 | WP_000867638.1 | 0 | 0 | 0 | 0 | 1 | 20 |
| 392 | NC_004741.1 | WP_009008053.1 | 0 | 0 | 0 | 0 | 0 | 0  |
| 393 | NC_004741.1 | WP_000639883.1 | 1 | 1 | 1 | 1 | 0 | 80 |
| 394 | NC_004741.1 | WP_000490072.1 | 1 | 1 | 1 | 1 | 0 | 80 |
| 395 | NC_004741.1 | WP_042188255.1 | 0 | 0 | 0 | 0 | 0 | 0  |
| 396 | NC_004741.1 | WP_000826512.1 | 1 | 1 | 1 | 1 | 0 | 80 |
| 397 | NC_004741.1 | WP_000201413.1 | 1 | 1 | 1 | 1 | 0 | 80 |
| 398 | NC_004741.1 | WP_000719924.1 | 1 | 0 | 1 | 0 | 0 | 40 |
| 399 | NC_004741.1 | WP_001107736.1 | 0 | 0 | 0 | 0 | 0 | 0  |
| 400 | NC_004741.1 | WP_000555795.1 | 0 | 0 | 0 | 0 | 0 | 0  |
| 401 | NC_004741.1 | WP_000338539.1 | 0 | 0 | 0 | 0 | 0 | 0  |
| 402 | NC_004741.1 | WP_001373377.1 | 0 | 0 | 0 | 0 | 0 | 0  |
| 403 | NC_004741.1 | WP_000806589.1 | 0 | 0 | 0 | 0 | 0 | 0  |
| 404 | NC_004741.1 | WP_001507728.1 | 1 | 1 | 1 | 1 | 0 | 80 |
| 405 | NC_004741.1 | WP_001308835.1 | 0 | 0 | 0 | 0 | 0 | 0  |
| 406 | NC_004741.1 | WP_001349976.1 | 1 | 0 | 0 | 0 | 0 | 20 |
| 407 | NC_004741.1 | WP_000339447.1 | 1 | 1 | 1 | 1 | 0 | 80 |
| 408 | NC_004741.1 | WP_001244758.1 | 1 | 0 | 0 | 0 | 0 | 20 |
| 409 | NC_004741.1 | WP_000017552.1 | 0 | 0 | 0 | 0 | 0 | 0  |
| 410 | NC_004741.1 | WP_000076001.1 | 1 | 1 | 1 | 1 | 0 | 80 |
| 411 | NC_004741.1 | WP_000755178.1 | 0 | 0 | 1 | 0 | 0 | 20 |
| 412 | NC_004741.1 | WP_000743213.1 | 0 | 0 | 0 | 0 | 0 | 0  |
| 413 | NC_004741.1 | WP_000131871.1 | 0 | 0 | 0 | 0 | 0 | 0  |
| 414 | NC_004741.1 | WP_000211355.1 | 1 | 1 | 1 | 1 | 0 | 80 |
| 415 | NC_004741.1 | WP_000213809.1 | 0 | 0 | 0 | 0 | 0 | 0  |
| 416 | NC_004741.1 | WP_001162384.1 | 1 | 1 | 1 | 1 | 0 | 80 |



|     |             |                |   |   |   |   |   |     |
|-----|-------------|----------------|---|---|---|---|---|-----|
| 417 | NC_004741.1 | WP_005047279.1 | 1 | 1 | 1 | 1 | 0 | 80  |
| 418 | NC_004741.1 | WP_001094726.1 | 1 | 1 | 1 | 1 | 0 | 80  |
| 419 | NC_004741.1 | WP_000266171.1 | 1 | 1 | 1 | 1 | 1 | 100 |
| 420 | NC_004741.1 | WP_000951754.1 | 1 | 0 | 0 | 0 | 0 | 20  |
| 421 | NC_004741.1 | WP_000647601.1 | 1 | 0 | 0 | 0 | 0 | 20  |
| 422 | NC_004741.1 | WP_012135949.1 | 0 | 0 | 0 | 0 | 0 | 0   |
| 423 | NC_004741.1 | WP_001303621.1 | 0 | 0 | 0 | 0 | 0 | 0   |
| 424 | NC_004741.1 | WP_032155618.1 | 0 | 0 | 0 | 0 | 0 | 0   |
| 425 | NC_004741.1 | WP_001330697.1 | 0 | 0 | 0 | 0 | 0 | 0   |
| 426 | NC_004741.1 | WP_001212392.1 | 1 | 1 | 1 | 1 | 0 | 80  |
| 427 | NC_004741.1 | WP_000589825.1 | 1 | 1 | 1 | 1 | 1 | 100 |
| 428 | NC_004741.1 | WP_000284119.1 | 0 | 0 | 0 | 0 | 0 | 0   |
| 429 | NC_004741.1 | WP_000491410.1 | 1 | 1 | 1 | 1 | 0 | 80  |
| 430 | NC_004741.1 | WP_000281320.1 | 1 | 1 | 1 | 1 | 0 | 80  |
| 431 | NC_004741.1 | WP_000483311.1 | 1 | 0 | 0 | 0 | 0 | 20  |
| 432 | NC_004741.1 | WP_001287454.1 | 1 | 1 | 1 | 1 | 0 | 80  |
| 433 | NC_004741.1 | WP_001307965.1 | 0 | 0 | 0 | 0 | 0 | 0   |
| 434 | NC_004741.1 | WP_000493764.1 | 1 | 0 | 0 | 0 | 0 | 20  |
| 435 | NC_004741.1 | WP_032155822.1 | 0 | 0 | 0 | 0 | 0 | 0   |
| 436 | NC_004741.1 | WP_000611930.1 | 0 | 0 | 0 | 0 | 0 | 0   |
| 437 | NC_004741.1 | WP_001224024.1 | 1 | 0 | 0 | 0 | 0 | 20  |
| 438 | NC_004741.1 | WP_001288227.1 | 0 | 0 | 0 | 0 | 0 | 0   |
| 439 | NC_004741.1 | WP_000444999.1 | 1 | 1 | 1 | 1 | 0 | 80  |
| 440 | NC_004741.1 | WP_000206987.1 | 1 | 1 | 1 | 1 | 0 | 80  |
| 441 | NC_004741.1 | WP_001393510.1 | 0 | 0 | 0 | 0 | 0 | 0   |
| 442 | NC_004741.1 | WP_000203905.1 | 1 | 1 | 1 | 1 | 0 | 80  |
| 443 | NC_004741.1 | WP_000184250.1 | 1 | 1 | 1 | 1 | 0 | 80  |
| 444 | NC_004741.1 | WP_001078387.1 | 1 | 1 | 1 | 1 | 0 | 80  |

|     |             |                |   |   |   |   |   |     |
|-----|-------------|----------------|---|---|---|---|---|-----|
| 445 | NC_004741.1 | WP_032155588.1 | 0 | 0 | 0 | 0 | 0 | 0   |
| 446 | NC_004741.1 | WP_000860229.1 | 0 | 0 | 0 | 0 | 0 | 0   |
| 447 | NC_004741.1 | WP_000242461.1 | 1 | 0 | 0 | 0 | 0 | 20  |
| 448 | NC_004741.1 | WP_000379402.1 | 0 | 0 | 0 | 0 | 0 | 0   |
| 449 | NC_004741.1 | WP_005099217.1 | 0 | 0 | 0 | 0 | 0 | 0   |
| 450 | NC_004741.1 | WP_005099219.1 | 0 | 0 | 0 | 0 | 0 | 0   |
| 451 | NC_004741.1 | WP_000971492.1 | 1 | 0 | 0 | 0 | 0 | 20  |
| 452 | NC_004741.1 | WP_005051685.1 | 1 | 1 | 1 | 1 | 1 | 100 |
| 453 | NC_004741.1 | WP_000528349.1 | 0 | 0 | 0 | 0 | 0 | 0   |
| 454 | NC_004741.1 | WP_001010156.1 | 0 | 0 | 0 | 0 | 0 | 0   |
| 455 | NC_004741.1 | WP_005051767.1 | 1 | 1 | 1 | 1 | 0 | 80  |
| 456 | NC_004741.1 | WP_011110620.1 | 0 | 1 | 1 | 0 | 0 | 40  |
| 457 | NC_004741.1 | WP_001094817.1 | 1 | 1 | 1 | 1 | 0 | 80  |
| 458 | NC_004741.1 | WP_000745204.1 | 1 | 1 | 1 | 1 | 0 | 80  |
| 459 | NC_004741.1 | WP_000984792.1 | 1 | 1 | 1 | 1 | 0 | 80  |
| 460 | NC_004741.1 | WP_005064025.1 | 0 | 1 | 0 | 1 | 0 | 40  |
| 461 | NC_004741.1 | WP_000338035.1 | 0 | 0 | 0 | 0 | 0 | 0   |
| 462 | NC_004741.1 | WP_000291751.1 | 0 | 0 | 0 | 0 | 0 | 0   |
| 463 | NC_004741.1 | WP_001323220.1 | 0 | 0 | 0 | 0 | 0 | 0   |
| 464 | NC_004741.1 | WP_032142224.1 | 0 | 0 | 0 | 0 | 0 | 0   |
| 465 | NC_004741.1 | WP_001128940.1 | 1 | 1 | 1 | 1 | 0 | 80  |
| 466 | NC_004741.1 | WP_001013320.1 | 1 | 1 | 1 | 1 | 0 | 80  |
| 467 | NC_004741.1 | WP_000271035.1 | 1 | 1 | 1 | 1 | 0 | 80  |
| 468 | NC_004741.1 | WP_001195464.1 | 1 | 1 | 1 | 1 | 0 | 80  |
| 469 | NC_004741.1 | WP_011069510.1 | 0 | 0 | 0 | 0 | 0 | 0   |
| 470 | NC_004741.1 | WP_005093820.1 | 0 | 0 | 0 | 0 | 1 | 20  |
| 471 | NC_004741.1 | WP_000261147.1 | 0 | 0 | 0 | 0 | 0 | 0   |
| 472 | NC_004741.1 | WP_005051842.1 | 0 | 0 | 0 | 0 | 0 | 0   |

|     |             |                |   |   |   |   |   |     |
|-----|-------------|----------------|---|---|---|---|---|-----|
| 473 | NC_004741.1 | WP_001069724.1 | 1 | 1 | 1 | 1 | 0 | 80  |
| 474 | NC_004741.1 | WP_005093816.1 | 0 | 0 | 0 | 0 | 0 | 0   |
| 475 | NC_004741.1 | WP_005051844.1 | 0 | 0 | 0 | 0 | 0 | 0   |
| 476 | NC_004741.1 | WP_001387238.1 | 1 | 1 | 1 | 1 | 1 | 100 |
| 477 | NC_004741.1 | WP_000692350.1 | 1 | 1 | 1 | 1 | 0 | 80  |
| 478 | NC_004741.1 | WP_000761715.1 | 0 | 0 | 0 | 0 | 0 | 0   |
| 479 | NC_004741.1 | WP_000772029.1 | 1 | 1 | 1 | 1 | 0 | 80  |
| 480 | NC_004741.1 | WP_000340141.1 | 0 | 0 | 0 | 0 | 0 | 0   |
| 481 | NC_004741.1 | WP_000853257.1 | 1 | 1 | 1 | 1 | 0 | 80  |
| 482 | NC_004741.1 | WP_000248097.1 | 1 | 1 | 1 | 1 | 1 | 100 |
| 483 | NC_004741.1 | WP_000984979.1 | 0 | 0 | 0 | 0 | 0 | 0   |
| 484 | NC_004741.1 | WP_000339534.1 | 1 | 0 | 0 | 0 | 0 | 20  |
| 485 | NC_004741.1 | WP_005051896.1 | 0 | 0 | 0 | 0 | 0 | 0   |
| 486 | NC_004741.1 | WP_001059136.1 | 1 | 1 | 1 | 1 | 0 | 80  |
| 487 | NC_004741.1 | WP_024167679.1 | 0 | 0 | 0 | 0 | 0 | 0   |
| 488 | NC_004741.1 | WP_001298764.1 | 0 | 0 | 0 | 0 | 0 | 0   |
| 489 | NC_004741.1 | WP_000691640.1 | 1 | 1 | 1 | 1 | 0 | 80  |
| 490 | NC_004741.1 | WP_000848528.1 | 1 | 1 | 1 | 1 | 1 | 100 |
| 491 | NC_004741.1 | WP_000527661.1 | 0 | 0 | 0 | 0 | 0 | 0   |
| 492 | NC_004741.1 | WP_001701108.1 | 0 | 0 | 0 | 0 | 0 | 0   |
| 493 | NC_004741.1 | WP_000442868.1 | 1 | 1 | 1 | 1 | 0 | 80  |
| 494 | NC_004741.1 | WP_001406537.1 | 0 | 0 | 0 | 0 | 0 | 0   |
| 495 | NC_004741.1 | WP_024259304.1 | 0 | 0 | 0 | 0 | 0 | 0   |
| 496 | NC_004741.1 | WP_001298386.1 | 0 | 0 | 0 | 0 | 0 | 0   |
| 497 | NC_004741.1 | WP_032140301.1 | 0 | 0 | 0 | 0 | 0 | 0   |
| 498 | NC_004741.1 | WP_000942538.1 | 1 | 1 | 1 | 1 | 0 | 80  |
| 499 | NC_004741.1 | WP_000016819.1 | 1 | 1 | 1 | 1 | 0 | 80  |
| 500 | NC_004741.1 | WP_000422149.1 | 1 | 1 | 1 | 1 | 0 | 80  |

|     |             |                |   |   |   |   |   |     |
|-----|-------------|----------------|---|---|---|---|---|-----|
| 501 | NC_004741.1 | WP_005050960.1 | 1 | 1 | 1 | 1 | 0 | 80  |
| 502 | NC_004741.1 | WP_000031415.1 | 1 | 1 | 1 | 1 | 0 | 80  |
| 503 | NC_004741.1 | WP_000785722.1 | 1 | 1 | 1 | 1 | 0 | 80  |
| 504 | NC_004741.1 | WP_000096080.1 | 1 | 1 | 1 | 1 | 0 | 80  |
| 505 | NC_004741.1 | WP_000732225.1 | 1 | 1 | 1 | 1 | 0 | 80  |
| 506 | NC_004741.1 | WP_005089560.1 | 0 | 0 | 0 | 0 | 0 | 0   |
| 507 | NC_004741.1 | WP_005050890.1 | 0 | 0 | 0 | 0 | 0 | 0   |
| 508 | NC_004741.1 | WP_001343556.1 | 1 | 1 | 1 | 1 | 0 | 80  |
| 509 | NC_004741.1 | WP_000449030.1 | 1 | 0 | 0 | 0 | 0 | 20  |
| 510 | NC_004741.1 | WP_000189314.1 | 1 | 1 | 1 | 1 | 1 | 100 |
| 511 | NC_004741.1 | WP_001346700.1 | 0 | 0 | 0 | 0 | 0 | 0   |
| 512 | NC_004741.1 | WP_000620405.1 | 1 | 1 | 1 | 1 | 0 | 80  |
| 513 | NC_004741.1 | WP_005077180.1 | 0 | 0 | 0 | 0 | 0 | 0   |
| 514 | NC_004741.1 | WP_005050708.1 | 1 | 1 | 1 | 1 | 0 | 80  |
| 515 | NC_004741.1 | WP_001028769.1 | 1 | 1 | 1 | 1 | 0 | 80  |
| 516 | NC_004741.1 | WP_001303690.1 | 0 | 0 | 0 | 0 | 0 | 0   |
| 517 | NC_004741.1 | WP_011110633.1 | 0 | 0 | 0 | 0 | 0 | 0   |
| 518 | NC_004741.1 | WP_001061203.1 | 0 | 0 | 0 | 0 | 0 | 0   |
| 519 | NC_004741.1 | WP_001326891.1 | 1 | 0 | 0 | 0 | 0 | 20  |
| 520 | NC_004741.1 | WP_024259309.1 | 1 | 1 | 1 | 1 | 0 | 80  |
| 521 | NC_004741.1 | WP_005050690.1 | 0 | 0 | 0 | 0 | 0 | 0   |
| 522 | NC_004741.1 | WP_000460680.1 | 1 | 1 | 1 | 1 | 0 | 80  |
| 523 | NC_004741.1 | WP_000757326.1 | 0 | 1 | 1 | 1 | 0 | 60  |
| 524 | NC_004741.1 | WP_000595564.1 | 1 | 1 | 1 | 1 | 0 | 80  |
| 525 | NC_004741.1 | WP_000487766.1 | 0 | 0 | 0 | 0 | 0 | 0   |
| 526 | NC_004741.1 | WP_024166609.1 | 0 | 0 | 0 | 0 | 0 | 0   |
| 527 | NC_004741.1 | WP_005050602.1 | 0 | 0 | 0 | 0 | 0 | 0   |
| 528 | NC_004741.1 | WP_011069598.1 | 1 | 1 | 1 | 1 | 0 | 80  |

|     |             |                |   |   |   |   |   |    |
|-----|-------------|----------------|---|---|---|---|---|----|
| 529 | NC_004741.1 | WP_000155673.1 | 1 | 1 | 1 | 1 | 0 | 80 |
| 530 | NC_004741.1 | WP_001014565.1 | 1 | 1 | 1 | 1 | 0 | 80 |
| 531 | NC_004741.1 | WP_001324833.1 | 0 | 0 | 0 | 0 | 0 | 0  |
| 532 | NC_004741.1 | WP_000719886.1 | 1 | 1 | 1 | 1 | 0 | 80 |
| 533 | NC_004741.1 | WP_001112357.1 | 1 | 0 | 0 | 0 | 0 | 20 |
| 534 | NC_004741.1 | WP_000169147.1 | 1 | 1 | 1 | 1 | 0 | 80 |
| 535 | NC_004741.1 | WP_032155643.1 | 0 | 0 | 0 | 0 | 0 | 0  |
| 536 | NC_004741.1 | WP_000627171.1 | 1 | 1 | 1 | 1 | 0 | 80 |
| 537 | NC_004741.1 | WP_023517643.1 | 0 | 1 | 0 | 1 | 0 | 40 |
| 538 | NC_004741.1 | WP_046201574.1 | 1 | 0 | 0 | 0 | 0 | 20 |
| 539 | NC_004741.1 | WP_000940102.1 | 1 | 1 | 1 | 1 | 0 | 80 |
| 540 | NC_004741.1 | WP_011110634.1 | 0 | 0 | 0 | 0 | 0 | 0  |
| 541 | NC_004741.1 | WP_001442985.1 | 0 | 1 | 0 | 1 | 0 | 40 |
| 542 | NC_004741.1 | WP_000660586.1 | 0 | 0 | 0 | 0 | 0 | 0  |
| 543 | NC_004741.1 | WP_000797352.1 | 1 | 1 | 1 | 1 | 0 | 80 |
| 544 | NC_004741.1 | WP_000655986.1 | 1 | 1 | 1 | 1 | 0 | 80 |
| 545 | NC_004741.1 | WP_000802226.1 | 1 | 1 | 1 | 1 | 0 | 80 |
| 546 | NC_004741.1 | WP_000591073.1 | 0 | 0 | 0 | 0 | 0 | 0  |
| 547 | NC_004741.1 | WP_000510376.1 | 0 | 0 | 0 | 0 | 0 | 0  |
| 548 | NC_004741.1 | WP_014334093.1 | 0 | 1 | 0 | 1 | 0 | 40 |
| 549 | NC_004741.1 | WP_001086388.1 | 0 | 0 | 0 | 0 | 0 | 0  |
| 550 | NC_004741.1 | WP_001295676.1 | 1 | 1 | 1 | 1 | 0 | 80 |
| 551 | NC_004741.1 | WP_032155602.1 | 0 | 0 | 0 | 0 | 0 | 0  |
| 552 | NC_004741.1 | WP_024259324.1 | 0 | 0 | 1 | 0 | 0 | 20 |
| 553 | NC_004741.1 | WP_000256409.1 | 1 | 1 | 1 | 1 | 0 | 80 |
| 554 | NC_004741.1 | WP_032142137.1 | 0 | 0 | 0 | 0 | 0 | 0  |
| 555 | NC_004741.1 | WP_000893994.1 | 0 | 0 | 0 | 0 | 0 | 0  |
| 556 | NC_004741.1 | WP_000115988.1 | 0 | 0 | 0 | 0 | 0 | 0  |

|     |             |                |   |   |   |   |   |    |
|-----|-------------|----------------|---|---|---|---|---|----|
| 557 | NC_004741.1 | WP_001295264.1 | 1 | 1 | 1 | 1 | 0 | 80 |
| 558 | NC_004741.1 | WP_005052859.1 | 1 | 1 | 1 | 1 | 0 | 80 |
| 559 | NC_004741.1 | WP_001277142.1 | 1 | 1 | 1 | 1 | 0 | 80 |
| 560 | NC_004741.1 | WP_024259323.1 | 1 | 0 | 0 | 0 | 0 | 20 |
| 561 | NC_004741.1 | WP_000032578.1 | 1 | 1 | 1 | 1 | 0 | 80 |
| 562 | NC_004741.1 | WP_001127088.1 | 0 | 0 | 0 | 0 | 0 | 0  |
| 563 | NC_004741.1 | WP_000841001.1 | 1 | 1 | 1 | 1 | 0 | 80 |
| 564 | NC_004741.1 | WP_000336276.1 | 0 | 0 | 0 | 0 | 0 | 0  |
| 565 | NC_004741.1 | WP_000456043.1 | 0 | 0 | 0 | 0 | 0 | 0  |
| 566 | NC_004741.1 | WP_005051995.1 | 1 | 1 | 1 | 1 | 0 | 80 |
| 567 | NC_004741.1 | WP_000454294.1 | 0 | 0 | 0 | 0 | 0 | 0  |
| 568 | NC_004741.1 | WP_032155619.1 | 0 | 0 | 0 | 0 | 0 | 0  |
| 569 | NC_004741.1 | WP_001113432.1 | 1 | 1 | 1 | 1 | 0 | 80 |
| 570 | NC_004741.1 | WP_000703959.1 | 1 | 1 | 1 | 1 | 0 | 80 |
| 571 | NC_004741.1 | WP_000511292.1 | 0 | 0 | 0 | 0 | 0 | 0  |
| 572 | NC_004741.1 | WP_005052029.1 | 1 | 1 | 1 | 1 | 0 | 80 |
| 573 | NC_004741.1 | WP_000772934.1 | 1 | 0 | 0 | 0 | 1 | 40 |
| 574 | NC_004741.1 | WP_005052034.1 | 1 | 1 | 1 | 1 | 0 | 80 |
| 575 | NC_004741.1 | WP_032155621.1 | 0 | 1 | 0 | 1 | 0 | 40 |
| 576 | NC_004741.1 | WP_000190670.1 | 1 | 0 | 0 | 0 | 0 | 20 |
| 577 | NC_004741.1 | WP_045178171.1 | 1 | 1 | 1 | 1 | 0 | 80 |
| 578 | NC_004741.1 | WP_005052068.1 | 1 | 1 | 1 | 1 | 0 | 80 |
| 579 | NC_004741.1 | WP_000542440.1 | 1 | 1 | 1 | 1 | 0 | 80 |
| 580 | NC_004741.1 | WP_032155816.1 | 0 | 0 | 0 | 0 | 0 | 0  |
| 581 | NC_004741.1 | WP_011069564.1 | 0 | 0 | 0 | 0 | 0 | 0  |
| 582 | NC_004741.1 | WP_001304210.1 | 0 | 0 | 0 | 0 | 0 | 0  |
| 583 | NC_004741.1 | WP_001004881.1 | 0 | 0 | 0 | 0 | 0 | 0  |
| 584 | NC_004741.1 | WP_045178164.1 | 0 | 0 | 0 | 0 | 0 | 0  |

|     |             |                |   |   |   |   |   |     |
|-----|-------------|----------------|---|---|---|---|---|-----|
| 585 | NC_004741.1 | WP_001390447.1 | 0 | 0 | 0 | 0 | 0 | 0   |
| 586 | NC_004741.1 | WP_005052132.1 | 0 | 0 | 0 | 0 | 0 | 0   |
| 587 | NC_004741.1 | WP_011069562.1 | 1 | 0 | 0 | 0 | 0 | 20  |
| 588 | NC_004741.1 | WP_000344113.1 | 0 | 0 | 0 | 0 | 0 | 0   |
| 589 | NC_004741.1 | WP_000999840.1 | 1 | 0 | 0 | 0 | 0 | 20  |
| 590 | NC_004741.1 | WP_000924289.1 | 1 | 1 | 1 | 1 | 0 | 80  |
| 591 | NC_004741.1 | WP_000621323.1 | 1 | 1 | 1 | 1 | 0 | 80  |
| 592 | NC_004741.1 | WP_001297375.1 | 1 | 1 | 1 | 1 | 1 | 100 |
| 593 | NC_004741.1 | WP_000483856.1 | 1 | 1 | 1 | 1 | 0 | 80  |
| 594 | NC_004741.1 | WP_000665677.1 | 1 | 1 | 1 | 1 | 0 | 80  |
| 595 | NC_004741.1 | WP_000517100.1 | 0 | 0 | 0 | 0 | 0 | 0   |
| 596 | NC_004741.1 | WP_000479627.1 | 1 | 1 | 1 | 1 | 0 | 80  |
| 597 | NC_004741.1 | WP_000332751.1 | 0 | 0 | 0 | 0 | 0 | 0   |
| 598 | NC_004741.1 | WP_001331222.1 | 0 | 1 | 0 | 1 | 0 | 40  |
| 599 | NC_004741.1 | WP_011069558.1 | 1 | 1 | 1 | 1 | 0 | 80  |
| 600 | NC_004741.1 | WP_000858193.1 | 1 | 1 | 1 | 1 | 1 | 100 |
| 601 | NC_004741.1 | WP_001296808.1 | 1 | 1 | 1 | 1 | 0 | 80  |
| 602 | NC_004741.1 | WP_000576411.1 | 1 | 1 | 1 | 1 | 0 | 80  |
| 603 | NC_004741.1 | WP_001296791.1 | 1 | 1 | 1 | 1 | 1 | 100 |
| 604 | NC_004741.1 | WP_000198578.1 | 0 | 0 | 0 | 0 | 0 | 0   |
| 605 | NC_004741.1 | WP_032155594.1 | 0 | 0 | 0 | 0 | 0 | 0   |
| 606 | NC_004741.1 | WP_001063318.1 | 1 | 1 | 1 | 1 | 0 | 80  |
| 607 | NC_004741.1 | WP_001328969.1 | 0 | 0 | 0 | 0 | 0 | 0   |
| 608 | NC_004741.1 | WP_001205330.1 | 0 | 0 | 0 | 0 | 1 | 20  |
| 609 | NC_004741.1 | WP_000020617.1 | 0 | 0 | 0 | 0 | 0 | 0   |
| 610 | NC_004741.1 | WP_005064932.1 | 0 | 0 | 0 | 0 | 0 | 0   |
| 611 | NC_004741.1 | WP_000555608.1 | 0 | 0 | 0 | 0 | 0 | 0   |
| 612 | NC_004741.1 | WP_000751953.1 | 0 | 0 | 0 | 0 | 0 | 0   |

|     |             |                |   |   |   |   |   |     |
|-----|-------------|----------------|---|---|---|---|---|-----|
| 613 | NC_004741.1 | WP_011069548.1 | 0 | 0 | 0 | 0 | 0 | 0   |
| 614 | NC_004741.1 | WP_032155607.1 | 0 | 0 | 0 | 0 | 0 | 0   |
| 615 | NC_004741.1 | WP_000643692.1 | 1 | 1 | 1 | 1 | 0 | 80  |
| 616 | NC_004741.1 | WP_005052620.1 | 1 | 1 | 1 | 1 | 0 | 80  |
| 617 | NC_004741.1 | WP_000042900.1 | 1 | 1 | 1 | 1 | 0 | 80  |
| 618 | NC_004741.1 | WP_000778795.1 | 1 | 1 | 1 | 1 | 1 | 100 |
| 619 | NC_004741.1 | WP_005093467.1 | 0 | 1 | 0 | 1 | 0 | 40  |
| 620 | NC_004741.1 | WP_001181212.1 | 0 | 0 | 0 | 0 | 0 | 0   |
| 621 | NC_004741.1 | WP_000907005.1 | 1 | 0 | 0 | 1 | 0 | 40  |
| 622 | NC_004741.1 | WP_005097678.1 | 1 | 0 | 0 | 0 | 0 | 20  |
| 623 | NC_004741.1 | WP_011069541.1 | 1 | 0 | 0 | 1 | 0 | 40  |
| 624 | NC_004741.1 | WP_001303701.1 | 1 | 0 | 0 | 0 | 0 | 20  |
| 625 | NC_004741.1 | WP_005052731.1 | 0 | 0 | 0 | 0 | 0 | 0   |
| 626 | NC_004741.1 | WP_001055752.1 | 0 | 0 | 0 | 0 | 0 | 0   |
| 627 | NC_004741.1 | WP_001254807.1 | 1 | 1 | 1 | 1 | 0 | 80  |
| 628 | NC_004741.1 | WP_005052744.1 | 1 | 0 | 0 | 0 | 1 | 40  |
| 629 | NC_004741.1 | WP_000497332.1 | 1 | 1 | 1 | 1 | 0 | 80  |
| 630 | NC_004741.1 | WP_000847163.1 | 1 | 1 | 1 | 1 | 0 | 80  |
| 631 | NC_004741.1 | WP_001303699.1 | 0 | 0 | 0 | 0 | 0 | 0   |
| 632 | NC_004741.1 | WP_001148908.1 | 1 | 1 | 1 | 1 | 0 | 80  |
| 633 | NC_004741.1 | WP_000907085.1 | 1 | 1 | 1 | 1 | 0 | 80  |
| 634 | NC_004741.1 | WP_001007729.1 | 1 | 1 | 1 | 1 | 0 | 80  |
| 635 | NC_004741.1 | WP_000786137.1 | 0 | 0 | 0 | 0 | 0 | 0   |
| 636 | NC_004741.1 | WP_005065417.1 | 1 | 1 | 1 | 1 | 0 | 80  |
| 637 | NC_004741.1 | WP_001295738.1 | 0 | 0 | 0 | 0 | 0 | 0   |
| 638 | NC_004741.1 | WP_000062539.1 | 1 | 1 | 1 | 1 | 0 | 80  |
| 639 | NC_004741.1 | WP_000242065.1 | 1 | 1 | 0 | 1 | 0 | 60  |
| 640 | NC_004741.1 | WP_032155811.1 | 0 | 0 | 0 | 0 | 0 | 0   |



|     |             |                |   |   |   |   |   |     |
|-----|-------------|----------------|---|---|---|---|---|-----|
| 641 | NC_004741.1 | WP_000121001.1 | 1 | 1 | 1 | 1 | 0 | 80  |
| 642 | NC_004741.1 | WP_024259336.1 | 0 | 0 | 0 | 0 | 0 | 0   |
| 643 | NC_004741.1 | WP_032155640.1 | 0 | 0 | 0 | 0 | 0 | 0   |
| 644 | NC_004741.1 | WP_001243676.1 | 1 | 1 | 1 | 1 | 0 | 80  |
| 645 | NC_004741.1 | WP_001351186.1 | 1 | 0 | 0 | 0 | 0 | 20  |
| 646 | NC_004741.1 | WP_011110644.1 | 1 | 1 | 1 | 1 | 0 | 80  |
| 647 | NC_004741.1 | WP_000079652.1 | 1 | 1 | 1 | 1 | 0 | 80  |
| 648 | NC_004741.1 | WP_001243871.1 | 1 | 1 | 1 | 1 | 0 | 80  |
| 649 | NC_004741.1 | WP_011069606.1 | 0 | 0 | 0 | 0 | 0 | 0   |
| 650 | NC_004741.1 | WP_000166281.1 | 1 | 1 | 1 | 1 | 0 | 80  |
| 651 | NC_004741.1 | WP_001296688.1 | 0 | 0 | 0 | 0 | 0 | 0   |
| 652 | NC_004741.1 | WP_005053984.1 | 1 | 1 | 1 | 1 | 0 | 80  |
| 653 | NC_004741.1 | WP_000937635.1 | 0 | 0 | 0 | 0 | 0 | 0   |
| 654 | NC_004741.1 | WP_001119485.1 | 1 | 1 | 1 | 1 | 0 | 80  |
| 655 | NC_004741.1 | WP_001205243.1 | 1 | 1 | 1 | 1 | 1 | 100 |
| 656 | NC_004741.1 | WP_000044756.1 | 0 | 0 | 0 | 0 | 0 | 0   |
| 657 | NC_004741.1 | WP_001008046.1 | 1 | 1 | 1 | 1 | 0 | 80  |
| 658 | NC_004741.1 | WP_001238362.1 | 1 | 1 | 1 | 1 | 1 | 100 |
| 659 | NC_004741.1 | WP_005134385.1 | 1 | 0 | 0 | 0 | 0 | 20  |
| 660 | NC_004741.1 | WP_001243705.1 | 1 | 1 | 1 | 1 | 0 | 80  |
| 661 | NC_004741.1 | WP_000943980.1 | 1 | 1 | 1 | 1 | 1 | 100 |
| 662 | NC_004741.1 | WP_005053837.1 | 1 | 0 | 0 | 0 | 0 | 20  |
| 663 | NC_004741.1 | WP_000492914.1 | 1 | 1 | 1 | 1 | 0 | 80  |
| 664 | NC_004741.1 | WP_032155818.1 | 0 | 0 | 0 | 0 | 0 | 0   |
| 665 | NC_004741.1 | WP_000895690.1 | 1 | 0 | 0 | 0 | 0 | 20  |
| 666 | NC_004741.1 | WP_000132640.1 | 1 | 1 | 1 | 1 | 1 | 100 |
| 667 | NC_004741.1 | WP_000467859.1 | 1 | 1 | 1 | 1 | 0 | 80  |
| 668 | NC_004741.1 | WP_005053796.1 | 0 | 0 | 0 | 0 | 0 | 0   |

|     |             |                |   |   |   |   |   |    |
|-----|-------------|----------------|---|---|---|---|---|----|
| 669 | NC_004741.1 | WP_000538192.1 | 1 | 1 | 1 | 1 | 0 | 80 |
| 670 | NC_004741.1 | WP_001338213.1 | 1 | 1 | 1 | 1 | 0 | 80 |
| 671 | NC_004741.1 | WP_000604352.1 | 1 | 1 | 1 | 1 | 0 | 80 |
| 672 | NC_004741.1 | WP_000494556.1 | 0 | 0 | 0 | 0 | 0 | 0  |
| 673 | NC_004741.1 | WP_000007444.1 | 0 | 0 | 0 | 0 | 0 | 0  |
| 674 | NC_004741.1 | WP_001303782.1 | 0 | 0 | 0 | 0 | 0 | 0  |

Note: 0 = 0%, 1 = 25%.

**Supplementary Table 2.** List of predicted physicochemical parameters of 39 hypothetical proteins

| Sl. No. | Accession ID_Protein | No. of amino acids | MW      | PI   | Extinction coefficient | Instability index | Classification | Alphabetic index | Grand average of hydropathicity (GRAVY) |
|---------|----------------------|--------------------|---------|------|------------------------|-------------------|----------------|------------------|-----------------------------------------|
| 1       | WP_005053355.1       | 274                | 29970.4 | 7.62 | 24325                  | 28.39             | Stable         | 84.01            | -0.016                                  |
| 2       | WP_000092054.1       | 364                | 40443.3 | 9.61 | 51005                  | 47.89             | Unstable       | 79.67            | -0.384                                  |
| 3       | WP_001382892.1       | 179                | 19590.3 | 5.28 | 2980                   | 35.06             | Stable         | 101.23           | -0.143                                  |
| 4       | WP_005053036.1       | 192                | 20906   | 9.04 | 7450                   | 35.73             | Stable         | 95.05            | -0.062                                  |
| 5       | WP_000779831.1       | 190                | 19441.2 | 7.87 | 6990                   | 45.39             | Unstable       | 96.58            | 0.172                                   |
| 6       | WP_011110552.1       | 108                | 12039.7 | 7.61 | 8730                   | 66.94             | Unstable       | 77.78            | -0.544                                  |
| 7       | WP_001269672.1       | 193                | 21386.6 | 8.73 | 11460                  | 31.1              | Stable         | 90.98            | -0.238                                  |
| 8       | WP_001247854.1       | 619                | 69683.8 | 5.5  | 107425                 | 33.35             | Stable         | 78.24            | -0.458                                  |
| 9       | WP_000070107.1       | 377                | 42056.8 | 7.71 | 52035                  | 31.62             | Stable         | 124.14           | 0.611                                   |
| 10      | WP_000224274.1       | 369                | 40593.3 | 7.03 | 40950                  | 37.16             | Stable         | 82.22            | -0.191                                  |
| 11      | WP_000749269.1       | 191                | 20942.5 | 5.57 | 16960                  | 11.14             | Stable         | 75.6             | -0.436                                  |
| 12      | WP_001125713.1       | 108                | 12371.5 | 9.16 | 7450                   | 53.58             | Unstable       | 82.13            | -0.624                                  |
| 13      | WP_001043881.1       | 165                | 18093.6 | 4.66 | 11585                  | 35.37             | Stable         | 101.09           | 0.133                                   |
| 14      | WP_001295493.1       | 114                | 12493.2 | 4.96 | 20970                  | 30.77             | Stable         | 97.63            | 0.024                                   |
| 15      | WP_000691930.1       | 84                 | 8942.38 | 7.66 | 12740                  | 41.42             | Unstable       | 81.31            | -0.167                                  |
| 16      | WP_000597196.1       | 155                | 15601.7 | 9.36 | 2980                   | 24.38             | Stable         | 94.77            | 0.114                                   |
| 17      | WP_000248636.1       | 370                | 39841.2 | 8.49 | 79075                  | 32.75             | Stable         | 143.05           | 1.029                                   |
| 18      | WP_000755956.1       | 275                | 30284.6 | 5.68 | 30035                  | 24.35             | Stable         | 84.04            | -0.331                                  |
| 19      | WP_001237866.1       | 107                | 11755.5 | 6.56 | 6210                   | 30.08             | Stable         | 97.57            | 0.277                                   |
| 20      | WP_000454701.1       | 527                | 59450.2 | 5.15 | 37930                  | 32.47             | Stable         | 116.7            | 0.177                                   |
| 21      | WP_000003197.1       | 219                | 24222.7 | 5.17 | 26595                  | 42.24             | Unstable       | 85.98            | -0.055                                  |
| 22      | WP_005049020.1       | 153                | 16568.1 | 7.7  | 7450                   | 23.39             | Stable         | 82.94            | -0.176                                  |
| 23      | WP_048814497.1       | 243                | 27279.8 | 4.72 | 22585                  | 43.49             | Unstable       | 104.32           | -0.255                                  |

|    |                |      |         |       |        |       |          |        |        |
|----|----------------|------|---------|-------|--------|-------|----------|--------|--------|
| 24 | WP_000301054.1 | 216  | 25324.2 | 9.31  | 51005  | 44.31 | Unstable | 77.64  | -0.482 |
| 25 | WP_000266171.1 | 1033 | 117109  | 5.58  | 244955 | 42.42 | Unstable | 83.71  | -0.343 |
| 26 | WP_000589825.1 | 160  | 17240.6 | 8.71  | 18450  | 39.1  | Stable   | 82.44  | -0.271 |
| 27 | WP_005051685.1 | 251  | 26572.5 | 10.11 | 34505  | 23.04 | Stable   | 76.18  | -0.279 |
| 28 | WP_001387238.1 | 158  | 17740.4 | 6.76  | 8480   | 28.12 | Stable   | 108.04 | -0.073 |
| 29 | WP_000248097.1 | 82   | 9417.1  | 4.02  | 6990   | 44.78 | Unstable | 135.37 | 0.266  |
| 30 | WP_000848528.1 | 85   | 9513.04 | 8.8   | 4720   | 42.38 | Unstable | 94.24  | -0.107 |
| 31 | WP_000189314.1 | 100  | 11241.9 | 9.84  | 11460  | 36.12 | Stable   | 84     | -0.544 |
| 32 | WP_001297375.1 | 222  | 25258.4 | 7.84  | 13075  | 32.89 | Stable   | 101.49 | -0.086 |
| 33 | WP_000858193.1 | 113  | 12552.2 | 9.33  | 14565  | 22.75 | Stable   | 129.38 | 1.041  |
| 34 | WP_001296791.1 | 232  | 25960.7 | 4.58  | 65890  | 36.83 | Stable   | 74.87  | -0.38  |
| 35 | WP_000778795.1 | 127  | 14544.5 | 6.59  | 26470  | 47.26 | Unstable | 85.98  | -0.412 |
| 36 | WP_001205243.1 | 294  | 32718.5 | 4.96  | 50795  | 48.91 | Unstable | 98.91  | -0.096 |
| 37 | WP_001238362.1 | 177  | 19911.7 | 8.88  | 35535  | 27.45 | Stable   | 78.25  | -0.194 |
| 38 | WP_000943980.1 | 387  | 45038.7 | 4.64  | 94685  | 46.38 | Unstable | 83.7   | -0.434 |
| 39 | WP_000132640.1 | 113  | 12294.1 | 8.64  | 10095  | 36.84 | Stable   | 87.26  | -0.168 |

MW, molecular weight; GRAVY, grand average of hydrophobicity.

**Supplementary Table 3.** List of predicted sub-cellular localization of 39 hypothetical proteins

| S. No. | Accession No.  | Sub-cellular localization  |                      |                | Signal peptide (Signal P) | Secretory protein (Secretome P) | Trans membrane helices prediction |              |                      |
|--------|----------------|----------------------------|----------------------|----------------|---------------------------|---------------------------------|-----------------------------------|--------------|----------------------|
|        |                | CELLO                      | PSORT B              | PSLpred        |                           |                                 | HMMTOP                            | TMHMM        | SOSUI                |
| 1      | WP_005053355.1 | Periplasmic                | Unknown              | Periplasmic    | Yes                       | Yes                             | No                                | No           | Soluble              |
| 2      | WP_000092054.1 | Periplasmic                | Unknown              | Periplasmic    | Yes                       | Yes                             | 1 TM Helices                      | No           | Soluble              |
| 3      | WP_001382892.1 | Periplasmic/ Extracellular | Unknown              | Outer membrane | Yes                       | Yes                             | No                                | No           | Soluble              |
| 4      | WP_005053036.1 | Periplasmic                | Unknown              | Periplasmic    | Yes                       | Yes                             | 1 TM Helices                      | No           | Membrane, 1 TM helix |
| 5      | WP_000779831.1 | Periplasmic                | Periplasmic          | Periplasmic    | Yes                       | Yes                             | No                                | No           | Soluble              |
| 6      | WP_011110552.1 | Periplasmic                | Unknown              | Periplasmic    | Yes                       | Yes                             | No                                | No           | Membrane, 1 TM helix |
| 7      | WP_001269672.1 | Periplasmic                | Outer membrane       | Periplasmic    | No                        | Yes                             | 2 TM Helices                      | No           | Membrane, 1 TM helix |
| 8      | WP_001247854.1 | Cytoplasmic                | Cytoplasmic          | Cytoplasmic    | No                        | No                              | No                                | No           | Soluble              |
| 9      | WP_000070107.1 | Inner membrane             | Cytoplasmic membrane | Inner-membrane | No                        | No                              | 6 TM Helices                      | 6 TM Helices | membrane, 6 TM helix |
| 10     | WP_000224274.1 | Periplasmic                | Unknown              | Cytoplasmic    | No                        | No                              | No                                | No           | Soluble              |
| 11     | WP_000749269.1 | Periplasmic                | Unknown              | Periplasmic    | Yes                       | No                              | 1 TM Helices                      | No           | Soluble              |

|    |                    |                                |                         |                   |     |     |                 |                  |                         |
|----|--------------------|--------------------------------|-------------------------|-------------------|-----|-----|-----------------|------------------|-------------------------|
| 12 | WP_0011257<br>13.1 | Cytoplasmic                    | Cytoplasmic             | Periplasmic       | No  | Yes | No              | No               | Soluble                 |
| 13 | WP_0010438<br>81.1 | Cytoplasmic                    | Unknown                 | Cytoplasmic       | No  | No  | No              | No               | Soluble                 |
| 14 | WP_0012954<br>93.1 | Cytoplasmic                    | Cytoplasmic             | Cytoplasmic       | No  | No  | No              | No               | Soluble                 |
| 15 | WP_0006919<br>30.1 | Periplasmic                    | Unknown                 | Periplasmic       | Yes | Yes | No              | No               | Membrane,<br>1 TM helix |
| 16 | WP_0005971<br>96.1 | Extracellular                  | Outer<br>membrane       | Extracellular     | No  | Yes | No              | No               | Membrane,<br>1 TM helix |
| 17 | WP_0002486<br>36.1 | Inner membrane                 | Cytoplasmic<br>membrane | Inner<br>membrane | No  | No  | 9 TM<br>Helices | 10 TM<br>Helices | 8 TM<br>Helices         |
| 18 | WP_0007559<br>56.1 | Periplasmic                    | Unknown                 | Periplasmic       | No  | Yes | No              | No               | Soluble                 |
| 19 | WP_0012378<br>66.1 | Cytoplasmic                    | Unknown                 | Cytoplasmic       | No  | No  | No              | No               | Membrane,<br>1 TM helix |
| 20 | WP_0004547<br>01.1 | Inner membrane                 | Cytoplasmic<br>membrane | InnerMembr<br>ane | No  | No  | 7 TM<br>Helices | 7 TM<br>Helices  | Membrane,<br>7 TM helix |
| 21 | WP_0000031<br>97.1 | Cytoplasmic                    | Unknown                 | Cytoplasmic       | No  | No  | No              | No               | Soluble                 |
| 22 | WP_0050490<br>20.1 | Periplasmic                    | Unknown                 | Periplasmic       | Yes | Yes | No              | No               | Membrane,<br>1 TM helix |
| 23 | WP_0488144<br>97.1 | Cytoplasmic/ Outer<br>membrane | Extracellular           | Extracellular     | No  | No  | No              | No               | Soluble                 |
| 24 | WP_0003010<br>54.1 | Cytoplasmic                    | Cytoplasmic             | Cytoplasmic       | No  | No  | No              | No               | Soluble                 |
| 25 | WP_0002661<br>71.1 | Cytoplasmic                    | Unknown                 | Cytoplasmic       | No  | No  | No              | No               | Soluble                 |

|    |                    |                         |                      |                |     |     |              |              |                         |
|----|--------------------|-------------------------|----------------------|----------------|-----|-----|--------------|--------------|-------------------------|
| 26 | WP_0005898<br>25.1 | Periplasmic             | Outer membrane       | Outer membrane | No  | Yes | No           | No           | Membrane,<br>1 TM helix |
| 27 | WP_0050516<br>85.1 | Extracellular           | Outer membrane       | Extracellular  | No  | yes | No           | 1 TM Helices | Soluble                 |
| 28 | WP_0013872<br>38.1 | Cytoplasmic             | Cytoplasmic          | Cytoplasmic    | No  | No  | No           | No           | Soluble                 |
| 29 | WP_0002480<br>97.1 | Cytoplasmic             | Unknown              | Cytoplasmic    | No  | No  | No           | No           | Soluble                 |
| 30 | WP_0008485<br>28.1 | Periplasmic             | Outer membrane       | Cytoplasmic    | No  | No  | 1 TM Helices | No           | Membrane,<br>1 TM helix |
| 31 | WP_0001893<br>14.1 | Cytoplasmic/Periplasmic | Unknown              | Outer membrane | No  | No  | No           | No           | Soluble                 |
| 32 | WP_0012973<br>75.1 | Cytoplasmic             | Cytoplasmic          | Cytoplasmic    | No  | No  | No           | No           | Soluble                 |
| 33 | WP_0008581<br>93.1 | Inner membrane          | Cytoplasmic membrane | Inner membrane | No  | No  | 4 TM Helices | 4 TM Helices | Membrane,<br>3 TM helix |
| 34 | WP_0012967<br>91.1 | Extracellular           | Extracellular        | Extracellular  | No  | Yes | 1 TM Helices | 1 TM Helices | Soluble                 |
| 35 | WP_0007787<br>95.1 | Cytoplasmic             | Unknown              | Cytoplasmic    | No  | No  | No           | No           | Soluble                 |
| 36 | WP_0012052<br>43.1 | Cytoplasmic             | Extracellular        | Cytoplasmic    | No  | No  | No           | 1 TM Helices | Soluble                 |
| 37 | WP_0012383<br>62.1 | Periplasmic             | Outer membrane       | Cytoplasmic    | Yes | Yes | No           | 1 TM Helices | Membrane,<br>1 TM helix |
| 38 | WP_0009439<br>80.1 | Cytoplasmic             | Cytoplasmic          | Cytoplasmic    | No  | No  | No           | No           | Soluble                 |
| 39 | WP_0001326<br>40.1 | Cytoplasmic             | Unknown              | Cytoplasmic    | No  | yes | No           | No           | Soluble                 |

**Supplementary Table 4.** List of annotated functions of 39 hypothetical proteins from *Shigella flexneri* using CDD-BLAST, Pfam, HmmScan, SMART, Scanprosite, PS2-v2, and STRING

| Sl. No | Acc ID         | Functional domain (BLAST,Pfam, HmmScan, SMART,Scanprosite)        | Templates   | Domain in (PS)2-v2    | Predicted functional partner (STRING)              |
|--------|----------------|-------------------------------------------------------------------|-------------|-----------------------|----------------------------------------------------|
| 1      | WP_005053355.1 | Peptidase, C92 family                                             | No template | Error                 | Minor fimbrial subunit, D-mannose specific adhesin |
| 2      | WP_000092054.1 | DUF1615/Lipoprotein                                               | 1m9iA       | Same                  | Microcin B17 transporter                           |
| 3      | WP_001382892.1 | DUF3251/lipoprotein YajI/immunoglobulin like domain               | 2jwyA       | Same                  | Hypothetical protein SF0234/ATP synthase           |
| 4      | WP_005053036.1 | Lipoprotein_16/Uncharacterized lipoprotein                        | 2iqiF       | Same                  | Regulatory protein AmpE                            |
| 5      | WP_000779831.1 | Lipoprotein chaperone (YscW)                                      | No template | Error                 | Universal stress protein UspB                      |
| 6      | WP_011110552.1 | YbfN-like lipoprotein                                             | No template | Error                 | Hypothetical protein ybfM                          |
| 7      | WP_001269672.1 | LPS-assembly lipoprotein RlpB (LptE)                              | 2r76A       | Same                  | LPS assembly outer membrane complex protein LptD   |
| 8      | WP_001247854.1 | Topoisomerases, DnaG-type primases, Hedgehog/Intein domain        | No template | Error                 | DNA-directed RNA polymerase subunit beta           |
| 9      | WP_000070107.1 | ATP-binding cassette transporter                                  | 2dyrA       | <b>OXIDOREDUCTASE</b> | ATP-binding protein ybhF_2                         |
| 10     | WP_000224274.1 | MOSC beta barrel domain/2Fe-2S iron-sulfur cluster binding domain | 2piaA       | Same                  | Fe/S biogenesis protein NfuA                       |
| 11     | WP_000749269.1 | YceI-like domain                                                  | 1y0gA       | Same                  | yceJ Cytochrome                                    |
| 12     | WP_001125713.1 | YcgL domain                                                       | 2h7aA       | Same                  | Hypothetical protein ycgN                          |



|    |                |                                                                |             |                    |                                                                   |
|----|----------------|----------------------------------------------------------------|-------------|--------------------|-------------------------------------------------------------------|
| 13 | WP_001043881.1 | GAF domain                                                     | 1vhmB       | Same               | Hypothetical protein; RNA chaperone proQ                          |
| 14 | WP_001295493.1 | Endoribonuclease L-PSP/YjgF family                             | 1qd9A       | Same               | D-amino acid dehydrogenase small subunit                          |
| 15 | WP_000691930.1 | Domain of unknown function (DUF333)                            | 2pqcA       | <b>TRANSFERASE</b> | Hypothetical protein yeaP                                         |
| 16 | WP_000597196.1 | Glycine zipper 2TM domain                                      | No template | Error              | Flagellar fliJ protein                                            |
| 17 | WP_000248636.1 | AI-2E family transporter/permease                              | 2jlnA       | Same               | Glutamine amidotransferase/anthranilate phosphoribosyltransferase |
| 18 | WP_000755956.1 | SPFH domain / Band 7 family                                    | 3bk6A       | Same               | Integrase                                                         |
| 19 | WP_001237866.1 | YecR-like lipoprotein                                          | No template | Error              | Glycosyl transferase                                              |
| 20 | WP_000454701.1 | TerC family/Transporter associated domain/CBS domain           | 2yvyA       | Same               | Glutamate synthase                                                |
| 21 | WP_000003197.1 | von Willebrand factor type A domain                            | 1atzB       | Same               | Chaperonin                                                        |
| 22 | WP_005049020.1 | Uncharacterized lipoprotein YehR                               | 2joeA       | Same               | Transporter                                                       |
| 23 | WP_048814497.1 | Leucine rich repeat protein/NEL or novel E3 ligase domain      | 3cvrA       | Same               | Aerobic respiration control sensor protein ArcB                   |
| 24 | WP_000301054.1 | Lipopolysaccharide kinase (Kdo/WaaP)                           | 1blxA       | Same               | Lipopolysaccharide core heptose(I) kinase RfaP                    |
| 25 | WP_000266171.1 | Tetratricopeptide repeat (TPR)                                 | No template | Error              | NAGC-like transcriptional regulator                               |
| 26 | WP_000589825.1 | Outer membrane protein (ompA) like domain/membrane lipoprotein | 2k1sA       | Same               | Hypothetical protein SF2663                                       |

|    |                |                                                                    |             |       |                                           |
|----|----------------|--------------------------------------------------------------------|-------------|-------|-------------------------------------------|
| 27 | WP_005051685.1 | LysM (lysin-like motif)/ Peptidase family M23                      | 2gu1A       | Same  | Beta-hexosaminidase                       |
| 28 | WP_001387238.1 | DNA repair protein RadC-like JAB domain                            | 2qlcA       | Same  | Hypothetical protein SF2995               |
| 29 | WP_000248097.1 | Carrier protein (CP) domain and phosphopantetheine attachment site | 1x3oA       | Same  | Class II aminotransferase                 |
| 30 | WP_000848528.1 | Lipoprotein leucine-zipper                                         | 1jcdB       | Same  | Porin                                     |
| 31 | WP_000189314.1 | GIY-YIG nuclease domain                                            | 1zg2A       | Same  | Hypothetical protein yhbP                 |
| 32 | WP_001297375.1 | DNA repair protein RadC-like JAB domain                            | No template | Error | DNA mismatch repair protein MutS;         |
| 33 | WP_000858193.1 | yiaA/B two helix domain                                            | 1oedA       | Same  | Hypothetical protein yiaA                 |
| 34 | WP_001296791.1 | Autotransporter beta-domain                                        | No template | Error | Biofilm formation regulatory protein BssR |
| 35 | WP_000778795.1 | Acetyltransferase (GNAT) domain                                    | 2k5tA       | Same  | Aspartate alpha-decarboxylase             |
| 36 | WP_001205243.1 | Xylose isomerase-like TIM barrel (AP_endonuc_2)                    | 1k77A       | Same  | 3-ketoacyl-ACP reductase                  |
| 37 | WP_001238362.1 | Lipocalin-like domain                                              | 1qwdA       | Same  | Sugar nucleotide epimerase                |
| 38 | WP_000943980.1 | Glutathionylspermidine synthase                                    | No template | Error | Nicotinate phosphoribosyltransferase      |
| 39 | WP_000132640.1 | Toxin SymE/SpoVT-AbrB domain                                       | 1ve0A       | Same  | Hypothetical protein SF1670               |

Note: Proteins with discrepant results are shown in bold.

**Supplementary Table 5.** List of annotated functions of 39 hypothetical proteins from *Shigella flexneri* using MOTIF, Interproscan, CATH, SUPERFAMILY, and ProtoNet

| SI No | Acc ID             | MOTIF                                             | INTERPROSCAN                                      | CATH                                | SUPERFAMILY                    | ProtoNet                                               |
|-------|--------------------|---------------------------------------------------|---------------------------------------------------|-------------------------------------|--------------------------------|--------------------------------------------------------|
| 1     | WP_00505335<br>5.1 | Papain-like amidase enzyme, YaeF/YiiX, C92 family | Papain-like amidase enzyme, YaeF/YiiX, C92 family | Lipoprotein/Uncharacterized protein | Cysteine proteinases YiiX-like | Cluster 3674930<br>Proteobacteria                      |
| 2     | WP_00009205<br>4.1 | Protein of unknown function (DUF1615)             | Protein of unknown function DUF1615               | No hit                              | GFP-like                       | Cluster 4109548<br>Protein of unknown function DUF1615 |
| 3     | WP_00138289<br>2.1 | Protein of unknown function (DUF3251)             | Domain of unknown function DUF3251                | Hypothetical lipoprotein yajI       | Phase 1 flagellin              | Cluster 3711586<br>2JWY                                |
| 4     | WP_00505303<br>6.1 | Uncharacterized lipoprotein                       | Uncharacterised protein family, YajG              | No hit                              | Phase 1 flagellin              | Cluster 4028813<br>Uncharacterized lipoprotein         |
| 5     | WP_00077983<br>1.1 | lipoprotein chaperone (YscW)                      | No result                                         | No hit                              | No result                      | Cluster 4131069<br>Proteobacteria                      |
| 6     | WP_01111055<br>2.1 | YbfN-like lipoprotein                             | YbfN-like lipoprotein                             | No hit                              | No result                      | Cluster 4085534<br>Lipoprotein                         |
| 7     | WP_00126967<br>2.1 | Lipopolysaccharide-assembly LptE                  | LPS-assembly lipoprotein LptE                     | LPS-assembly lipoprotein LptE       | No result                      | Cluster 3965977<br>Rare lipoprotein B                  |
| 8     | WP_00124785<br>4.1 | Toprim-like                                       | DNA primase/Toprim domain                         | DNA primase/helicase                | DNA primase/helicase core      | Cluster 3410389<br>DNA helicase, DnaB-like             |
| 9     | WP_00007010        | ABC-2 family                                      | ABC-2 transporter                                 | membrane transport                  | MFS general                    | Cluster 4114591                                        |

|    |                    |                                               |                                           |                                               |                                     |                                                          |
|----|--------------------|-----------------------------------------------|-------------------------------------------|-----------------------------------------------|-------------------------------------|----------------------------------------------------------|
|    | 7.1                | transporter protein                           |                                           | permease YbhS/ATP-binding protein             | substrate transporter               | ABC-2                                                    |
| 10 | WP_00022427<br>4.1 | MOSC domain/<br>2Fe-2S iron-sulfur<br>cluster | MOSC, N-terminal<br>beta barrel           | MOSC domain/<br>2Fe-2S<br>iron-sulfur cluster | MOSC N-<br>terminal domain-<br>like | Cluster 4155424<br>MOSC, N-terminal<br>beta barrel       |
| 11 | WP_00074926<br>9.1 | YceI-like domain                              | YceI-like domain                          | YceI-like domain                              | YceI-like domain                    | Cluster 4314345<br>YceI-like                             |
| 12 | WP_00112571<br>3.1 | YcgL domain                                   | YcgL domain                               | No hit                                        | YcgL-like                           | Cluster 4083593<br>YcgL domain                           |
| 13 | WP_00104388<br>1.1 | GAF domain                                    | GAF domain                                | GAF domain                                    | GAF domain                          | Cluster 4085038<br>GAF                                   |
| 14 | WP_00129549<br>3.1 | Endoribonuclease<br>L-PSP                     | YjgF/L-PSP                                | Endoribonuclease L-<br>PSP family             | YjgF/L-PSP                          | Cluster 4054994<br>YjgF/L-PSP                            |
| 15 | WP_00069193<br>0.1 | Domain of<br>unknown function<br>(DUF333)     | Domain of<br>unknown function<br>(DUF333) | No hit                                        | No result                           | Cluster 4079210<br>Protein of unknown<br>function DUF333 |
| 16 | WP_00059719<br>6.1 | Glycine zipper<br>2TM domain                  | Glycine zipper<br>2TM domain              | No hit                                        | No result                           | Cluster 4073223<br>Glycine zipper<br>2TM domain          |
| 17 | WP_00024863<br>6.1 | AI-2E family<br>transporter                   | AI-2E family<br>transporter               | No hit                                        | No result                           | Cluster 4074174<br>AI-2E family<br>transporter           |
| 18 | WP_00075595<br>6.1 | SPFH domain /<br>Band 7 family                | SPFH domain /<br>Band 7 family            | No hit                                        | Band 7/SPFH<br>domain               | Cluster 3793474<br>Band 7/SPFH<br>domain                 |
| 19 | WP_00123786<br>6.1 | YecR-like<br>lipoprotein                      | YecR-like<br>lipoprotein                  | No hit                                        | SRCR-like                           | Cluster 3743846<br>Enterobacteriales                     |
| 20 | WP_00045470<br>1.1 | TerC<br>family/Transporter                    | TerC<br>family/Transporter                | TerC<br>family/Transporter                    | CBS-domain<br>pair/transporter-     | Cluster 4019065<br>membrane protein                      |

|    |                    |                                                 |                                                 |                                              |                                      |                                                                 |
|----|--------------------|-------------------------------------------------|-------------------------------------------------|----------------------------------------------|--------------------------------------|-----------------------------------------------------------------|
|    |                    | associated domain/CBS domain                    | associated domain/CBS domain                    | associated domain/CBS domain                 | associated domain                    | TerC                                                            |
| 21 | WP_00000319<br>7.1 | von Willebrand factor type A domain             | TerY/vWA-like                                   | von Willebrand factor type A domain          | vWA-like                             | Cluster 4002958<br>TerY/vWA-like                                |
| 22 | WP_00504902<br>0.1 | Protein of unknown function (DUF1307)/YehR-like | Protein of unknown function (DUF1307)/YehR-like | Putative lipoprotein YehR                    | YehR-like                            | Cluster 4046970 Protein of unknown function (DUF1307)/YehR-like |
| 23 | WP_04881449<br>7.1 | Leucine Rich repeats                            | LRR-containing bacterial E3 ligase              | leucine rich repeat protein/E3 ligase domain | Leucine Rich repeats                 | Cluster 4154032<br>Protein binding                              |
| 24 | WP_00030105<br>4.1 | Lipopolysaccharide kinase (Kdo/WaaP)            | Lipopolysaccharide kinase                       | Lipopolysaccharide kinase (Kdo/WaaP)         | Lipopolysaccharide kinase (Kdo/WaaP) | Cluster 3990101<br>Lipopolysaccharide kinase                    |
| 25 | WP_00026617<br>1.1 | Tetratricopeptide repeat                        | Tetratricopeptide-like domain                   | TPR repeat-containing protein                | TPR-like                             | Cluster 4040666<br>Tetratricopeptide region                     |
| 26 | WP_00058982<br>5.1 | OmpA family                                     | OmpA-like domain                                | outer membrane lipoprotein                   | OmpA-like                            | Cluster 4198784<br>Outer membrane protein                       |
| 27 | WP_00505168<br>5.1 | Peptidase family M23/LysM domain                | Peptidase M23/LysM domain                       | Peptidase M23                                | Peptidoglycan hydrolase LytM         | Cluster 4141397<br>Peptidase M23B                               |
| 28 | WP_00138723<br>8.1 | RadC-like JAB domain                            | RadC protein                                    | DNA repair protein RadC                      | JAB1/MPN domain                      | Cluster 4114260<br>RadC protein                                 |
| 29 | WP_00024809<br>7.1 | Phosphopantetheine attachment site              | Phosphopantetheine binding ACP                  | Acyl carrier protein                         | Acyl-carrier protein (ACP)           | Cluster 4146821<br>Phosphopantetheine                           |

|    |                    |                                                     |                                                        |                                          |                                                           |                                                         |
|----|--------------------|-----------------------------------------------------|--------------------------------------------------------|------------------------------------------|-----------------------------------------------------------|---------------------------------------------------------|
|    |                    |                                                     |                                                        |                                          |                                                           | -binding                                                |
| 30 | WP_00084852<br>8.1 | Lipoprotein<br>leucine-zipper                       | Murein-lipoprotein                                     | Major outer membrane<br>lipoprotein      | Outer membrane<br>lipoprotein                             | Cluster 4066376<br>Murein-lipoprotein                   |
| 31 | WP_00018931<br>4.1 | GIY-YIG catalytic<br>domain                         | GIY-YIG<br>endonuclease                                | No hit                                   | GIY-YIG<br>endonuclease                                   | Cluster 4157077<br>GIY-YIG<br>endonuclease              |
| 32 | WP_00129737<br>5.1 | RadC-like JAB<br>domain                             | RadC-like JAB<br>domain                                | DNA repair protein<br>RadC               | RuvA domain 2-<br>like/JAB1/MPN<br>domain                 | Cluster 4403730<br>RadC-like JAB<br>domain              |
| 33 | WP_00085819<br>3.1 | yiaA/B two helix<br>domain                          | YiaAB two helix                                        | No hit                                   | No result                                                 | Cluster 4440457<br>YiaAB two helix                      |
| 34 | WP_00129679<br>1.1 | Autotransporter<br>beta-domain                      | Autotransporter,<br>YhjY                               | No hit                                   | Autotransporter                                           | Cluster 3853611<br>Autotransporter,<br>YhjY             |
| 35 | WP_00077879<br>5.1 | Acetyltransferase<br>(GNAT) domain                  | Acyl-CoA N-<br>acyltransferase                         | Putative N-<br>acetyltransferase         | Acyl-CoA N-<br>acyltransferases<br>(Nat)                  | Cluster 4355736<br>N-acetyltransferase<br>activity      |
| 36 | WP_00120524<br>3.1 | Xylose isomerase-<br>like TIM barrel                | Xylose isomerase-<br>like TIM barrel                   | Putative<br>hydroxypyruvate<br>isomerase | Xylose<br>isomerase-like                                  | Cluster 4100779<br>Xylose isomerase-<br>type TIM barrel |
| 37 | WP_00123836<br>2.1 | Lipocalin-like<br>domain                            | Lipocalin, ApoD<br>type                                | Outer membrane<br>lipoprotein Blc        | Lipocalins                                                | Cluster 4145424<br>Lipocalin                            |
| 38 | WP_00094398<br>0.1 | Glutathionylspermi<br>dine synthase<br>preATP-grasp | Glutathionylspermi<br>dine synthase, pre-<br>ATP-grasp | No hit                                   | Glutathione<br>synthetase ATP-<br>binding domain-<br>like | Cluster 4243753<br>Glutathionylspermi<br>dine synthase  |
| 39 | WP_00013264<br>0.1 | Toxin SymE, type I<br>toxin-antitoxin<br>system     | Type I toxin-<br>antitoxin system,<br>SymE toxin       | No hit                                   | No result                                                 | Cluster 4040297<br>Toxin SymE-like                      |

**Supplementary Table 6.** List of annotated functions of 25 proteins with known function from *Shigella flexneri* using BLAST, Pfam, Hmmscan, SMART, and Scanprosite for receiver operating characteristic analysis

| Sl no | Acc ID protein | Protein name             | BLAST                                        | Pfam                          | Hmmscan                       | SMART                         | Scanprosite                              |
|-------|----------------|--------------------------|----------------------------------------------|-------------------------------|-------------------------------|-------------------------------|------------------------------------------|
| 1     | WP_000241642.1 | Homoserine kinase        | Homoserine kinase 1 (5)                      | Homoserine kinase 1 (5)       | Homoserine kinase 1 (5)       | Homoserine kinase 1 (5)       | Homoserine kinase 1 (5)                  |
| 2     | WP_000809168.1 | Protein hokC             | Protein hokC 1 (5)                           | Protein hokC 1 (5)            | Protein hokC 1 (5)            | Protein hokC 1 (5)            | Protein hokC 1 (5)                       |
| 3     | WP_001286897.1 | Isoleucine--tRNA ligase  | Isoleucine--tRNA ligase 1 (5)                | Isoleucine--tRNA ligase 1 (5) | Isoleucine--tRNA ligase 1 (5) | Isoleucine--tRNA ligase 1 (5) | Isoleucine--tRNA ligase 1 (5)            |
| 4     | WP_000124415.1 | Ferrichrome porin FhuA   | Ferrichrome outer membrane transporter 1 (4) | TonB dependent receptor 0 (2)            |
| 5     | WP_001183183.1 | MFS transporter          | MFS transporter 1 (5)                        | MFS transporter 1 (5)         | MFS transporter 1 (5)         | MFS transporter 1 (5)         | MFS transporter 1 (5)                    |
| 6     | WP_001230481.1 | Ail/Lom family protein   | OM_channels super family 1 (3)               | Ail/Lom protein 1 (5)         | Ail/Lom protein 1 (5)         | Ail/Lom protein 1 (5)         | Virulence outer membrane protein 1 (3)   |
| 7     | WP_001287126.1 | Glutamine--tRNA ligase   | Glutaminyl-tRNA synthetase 1 (5)             | tRNA synthetases 1 (5)        | tRNA synthetases 1 (5)        | tRNA synthetases 1 (5)        | Aminoacyl-transfer RNA synthetases 1 (5) |
| 8     | WP_001295442.1 | Flagellar L-ring protein | Flagellar basal body L-                      | Flagellar L-ring protein 1    | Flagellar L-ring protein 1    | Flagellar L-ring protein 1    | PROKAR_LIPOPROTEIN 0 (3)                 |

|    |                |                                       |                                             |                                             |                                             |                                             |                                             |
|----|----------------|---------------------------------------|---------------------------------------------|---------------------------------------------|---------------------------------------------|---------------------------------------------|---------------------------------------------|
|    |                |                                       | ring protein 1 (4)                          | (5)                                         | (5)                                         | (5)                                         |                                             |
| 9  | WP_000130034.1 | D-alanine--D-alanine ligase           | D-alanine--D-alanine ligase 1 (5)           |
| 10 | WP_000197853.1 | Alanine racemase                      | Alanine racemase 1 (5)                      |
| 11 | WP_000569431.1 | Ribonuclease HII                      | Ribonuclease HII 1 (5)                      | No hit 0 (5)                                |
| 12 | WP_000901098.1 | VOC family protein                    | VOC family protein 1 (5)                    |
| 13 | WP_001260712.1 | Proline--tRNA ligase                  | Proline--tRNA ligase 1 (5)                  |
| 14 | WP_000051892.1 | Integrase                             | Integrase 1 (5)                             | Integrase 1 (5)                             | Integrase 1 (5)                             | Integrase 1 (5)                             | No hit 0 (5)                                |
| 15 | WP_001120449.1 | Oxidoreductase                        | Oxidoreductase 1 (5)                        |
| 16 | WP_000460136.1 | LysR family transcriptional regulator | LysR family transcriptional regulator 1 (5) |
| 17 | WP_001018618.1 | Flavodoxin-1                          | Flavodoxin-1 1 (5)                          |
| 18 | WP_000773301.1 | Acyl-CoA esterase                     | Acyl-CoA esterase 1 (5)                     | No hit 0 (5)                                |
| 19 | WP_000201488.1 | DNA-packaging                         | DNA-packaging                               | DNA-packaging                               | DNA-packaging                               | DNA-packaging                               | No hit 0 (5)                                |



|    |                |                                  |                                              |                                              |                                              |                                              |                                       |
|----|----------------|----------------------------------|----------------------------------------------|----------------------------------------------|----------------------------------------------|----------------------------------------------|---------------------------------------|
|    |                | protein FI                       | protein FI 1<br>(5)                          | protein FI 1<br>(5)                          | protein FI 1<br>(5)                          | protein FI 1<br>(5)                          |                                       |
| 20 | WP_005049594.1 | Terminase                        | Terminase 1<br>(5)                           | Terminase 1<br>(5)                           | Terminase 1<br>(5)                           | Terminase 1<br>(5)                           | No hit 0 (5)                          |
| 21 | WP_000537402.1 | Thioredoxin-disulfide reductase  | Thioredoxin-disulfide reductase 1<br>(5)     | Thioredoxin-disulfide reductase 1<br>(5)     | Thioredoxin-disulfide reductase 1<br>(5)     | Thioredoxin-disulfide reductase 1<br>(5)     | Thioredoxin-disulfide reductase 1 (5) |
| 22 | WP_000109301.1 | MFS transporter                  | MFS transporter 1<br>(5)                     | MFS transporter 1<br>(5)                     | MFS transporter 1<br>(5)                     | MFS transporter 1<br>(5)                     | MFS transporter 1 (5)                 |
| 23 | WP_005047463.1 | Porin OmpA                       | Porin OmpA 1 (5)                             | Porin OmpA 1 (5)                      |
| 24 | WP_001247604.1 | YjbF family lipoprotein          | YjbF family lipoprotein 1<br>(5)             | YjbF family lipoprotein 1 (5)         |
| 25 | WP_014532269.1 | DUF333 domain-containing protein | Domain of unknown function (DUF333) 1<br>(5) | PROKAR_LIPOPROTEIN 0 (3)              |

True positive and true negative are denoted by “1” and “0”.

Integers in parentheses denote the confidence level.

**Supplementary Table 7.** List of annotated functions of 25 proteins with known function from *Shigella flexneri* using MOTIF, Interproscan, CATH, SUPERFAMILY, and ProtoNet for receiver operating characteristic analysis

| Sl No | Acc ID protein | Protein name             | MOTIF                          | INTERPROSCAN                              | CATH                                      | SUPERFAMILY                               | ProtoNet                                  |
|-------|----------------|--------------------------|--------------------------------|-------------------------------------------|-------------------------------------------|-------------------------------------------|-------------------------------------------|
| 1     | WP_000241642.1 | Homoserine kinase        | Homoserine kinase 1 (5)        | Homoserine kinase 1 (5)                   | Homoserine kinase 1 (5)                   | Homoserine kinase 1 (5)                   | Homoserine kinase 1 (5)                   |
| 2     | WP_000809168.1 | Protein hokC             | hok_gef 1 (3)                  | hok_gef 1 (3)                             | 0 (5)                                     | hok_gef 0 (5)                             | hok_gef 1 (3)                             |
| 3     | WP_001286897.1 | Isoleucine--tRNA ligase  | Isoleucine--tRNA ligase 1 (5)  | Isoleucine--tRNA ligase 1 (5)             | Isoleucine--tRNA ligase 1 (5)             | Isoleucine--tRNA ligase 1 (5)             | Isoleucine--tRNA ligase 1 (5)             |
| 4     | WP_000124415.1 | Ferrichrome porin FhuA   | TonB-dependent Receptor 0 (2)  | TonB-dependent siderophore receptor 0 (2) | TonB-dependent siderophore receptor 0 (2) | TonB-dependent siderophore receptor 0 (2) | TonB-dependent siderophore receptor 0 (2) |
| 5     | WP_001183183.1 | MFS transporter          | MFS transporter 1 (5)          | MFS transporter 1 (5)                     | MFS transporter 1 (5)                     | MFS transporter 1 (5)                     | MFS transporter 1 (5)                     |
| 6     | WP_001230481.1 | Ail/Lom family protein   | Ail/Lom family protein 1 (5)   | Ail/Lom family protein 1 (5)              | Ail/Lom family protein 1 (5)              | Ail/Lom family protein 1 (5)              | Ail/Lom family protein 1 (5)              |
| 7     | WP_001287126.1 | Glutamine--tRNA ligase   | Glutamine--tRNA ligase 1 (5)   | Glutamine--tRNA ligase 1 (5)              | Glutamine--tRNA ligase 1 (5)              | Glutamine--tRNA ligase 1 (5)              | Glutamine--tRNA ligase 1 (5)              |
| 8     | WP_001295442.1 | Flagellar L-ring protein | Flagellar L-ring protein 1 (5) | Flagellar L-ring protein 1 (5)            | 0 (5)                                     | Flagellar L-ring protein 0 (5)            | Flagellar L-ring protein 1 (5)            |

|    |                |                                       |                                             |                                                               |                                             |                                                             |                                             |
|----|----------------|---------------------------------------|---------------------------------------------|---------------------------------------------------------------|---------------------------------------------|-------------------------------------------------------------|---------------------------------------------|
| 9  | WP_000130034.1 | D-alanine--D-alanine ligase           | D-alanine--D-alanine ligase 1 (5)           | D-alanine--D-alanine ligase 1 (5)                             | D-alanine--D-alanine ligase 1 (5)           | D-alanine--D-alanine ligase 1 (5)                           | D-alanine--D-alanine ligase 1 (5)           |
| 10 | WP_000197853.1 | Alanine racemase                      | Alanine racemase 1 (5)                      | Alanine racemase 1 (5)                                        | Alanine racemase 1 (5)                      | Alanine racemase 1 (5)                                      | Alanine racemase 1 (5)                      |
| 11 | WP_000569431.1 | Ribonuclease HII                      | Ribonuclease HII 1 (5)                      | Ribonuclease HII 1 (5)                                        | Ribonuclease HII 1 (5)                      | Ribonuclease HII 1 (5)                                      | Ribonuclease HII 1 (5)                      |
| 12 | WP_000901098.1 | VOC family protein                    | VOC family protein 1 (5)                    | VOC family protein 1 (5)                                      | VOC family protein 1 (5)                    | VOC family protein 1 (5)                                    | VOC family protein 1 (5)                    |
| 13 | WP_001260712.1 | Proline--tRNA ligase                  | Proline--tRNA ligase 1 (5)                  | Proline--tRNA ligase 1 (5)                                    | Proline--tRNA ligase 1 (5)                  | Proline--tRNA ligase 1 (5)                                  | Proline--tRNA ligase 1 (5)                  |
| 14 | WP_000051892.1 | Integrase                             | Integrase 1 (5)                             | Integrase 1 (5)                                               | Integrase 1 (5)                             | Integrase 1 (5)                                             | Integrase 1 (5)                             |
| 15 | WP_001120449.1 | Oxidoreductase                        | Oxidoreductase 1 (5)                        | Oxidoreductase 1 (5)                                          | Oxidoreductase 1 (5)                        | Oxidoreductase 1 (5)                                        | Oxidoreductase 1 (5)                        |
| 16 | WP_000460136.1 | LysR family transcriptional regulator | LysR family transcriptional regulator 1 (5) | LysR family transcriptional regulator 1 (5)                   | LysR family transcriptional regulator 1 (5) | LysR family transcriptional regulator 1 (5)                 | LysR family transcriptional regulator 1 (5) |
| 17 | WP_001018618.1 | Flavodoxin-1                          | Flavodoxin_1, 3, 4, 5 1 (3)                 | Flavodoxin, long chain 1 (3)                                  | Short-chain flavodoxin YkuP 1 (3)           | Flavodoxin, long chain 1 (3)                                | Flavodoxin, long chain 1 (3)                |
| 18 | WP_000773301.1 | Acyl-CoA esterase                     | Alpha/beta hydrolase fold 1 (3)             | Alpha/beta hydrolase fold, alpha/beta hydrolase fold, 1 1 (3) | Esterase Ybff 1 (5)                         | Alpha/beta hydrolase fold, alpha/beta hydrolase fold, 1 (3) | Alpha/beta hydrolase fold-1 1 (3)           |
| 19 | WP_000201488.1 | DNA-packaging                         | DNA-packaging                               | DNA-packaging protein FI 1 (5)                                | 0 (5)                                       | DNA-packaging protein FI 0 (5)                              | DNA-packaging                               |

|    |                |                                  |                                                     |                                                               |                               |                                                               |                                        |
|----|----------------|----------------------------------|-----------------------------------------------------|---------------------------------------------------------------|-------------------------------|---------------------------------------------------------------|----------------------------------------|
|    |                | protein FI                       | protein FI 1 (5)                                    |                                                               |                               |                                                               | protein FI 1 (5)                       |
| 20 | WP_005049594.1 | Terminase                        | Phage terminase large subunit (GpA) 1 (3)           | Bacteriophage lambda, GpA 1 (3)                               | 0 (5)                         | Bacteriophage lambda, GpA 0 (5)                               | Phage terminase GpA 1 (3)              |
| 21 | WP_000537402.1 | Thioredoxin-disulfide reductase  | Pyridine nucleotide-disulphide oxidoreductase 1 (3) | Pyridine nucleotide-disulphide oxidoreductase, class-II 1 (4) | Thioredoxin reductase 1 (4)   | Pyridine nucleotide-disulphide oxidoreductase, class-II 1 (3) | Thioredoxin-disulfide reductase 1 (5)  |
| 22 | WP_000109301.1 | MFS transporter                  | MFS transporter 1 (5)                               | MFS transporter 1 (5)                                         | MFS transporter 1 (5)         | MFS transporter 1 (5)                                         | MFS transporter 1 (5)                  |
| 23 | WP_005047463.1 | Porin OmpA                       | Porin OmpA 1 (5)                                    | Porin OmpA 1 (5)                                              | Porin OmpA 1 (5)              | Porin OmpA 1 (5)                                              | Porin OmpA 1 (5)                       |
| 24 | WP_001247604.1 | YjbF family lipoprotein          | YjbF family lipoprotein 1 (5)                       | YjbF family lipoprotein 1 (5)                                 | YjbF family lipoprotein 1 (5) | YjbF family lipoprotein 1 (5) YjbF family lipoprotein 1 (5)   | YjbF family lipoprotein 1 (5)          |
| 25 | WP_014532269.1 | DUF333 domain-containing protein | DUF333 domain-containing protein 1 (5)              | DUF333 domain-containing protein 1 (5)                        | 0 (5)                         | DUF333 domain-containing protein 1 (5)                        | DUF333 domain-containing protein 1 (5) |

True positive and true negative are denoted by “1” and “0.”

Integers in parentheses denote the confidence level.

**Supplementary Table 8.** List of predicted virulence factors of 39 hypothetical proteins by using VICMPred and Virulentpred

| <b>Sl. No.</b> | <b>Acc ID_Protein</b> | <b>VICMPred</b>         | <b>Virulentpred</b> |
|----------------|-----------------------|-------------------------|---------------------|
| 1              | WP_005053355.1        | Cellular process        | Virulent            |
| 2              | WP_000092054.1        | Cellular process        | Virulent            |
| 3              | WP_001382892.1        | Information and storage | Virulent            |
| 4              | WP_005053036.1        | Cellular process        | Virulent            |
| 5              | WP_000779831.1        | Cellular process        | Virulent            |
| 6              | WP_011110552.1        | Information and storage | Virulent            |
| 7              | WP_001269672.1        | Metabolism Molecule     | Virulent            |
| 8              | WP_001247854.1        | Virulence factors       | Non-Virulent        |
| 9              | WP_000070107.1        | Metabolism Molecule     | Non-Virulent        |
| 10             | WP_000224274.1        | Cellular process        | Non-Virulent        |
| 11             | WP_000749269.1        | Virulence factors       | Virulent            |
| 12             | WP_001125713.1        | Cellular process        | Virulent            |
| 13             | WP_001043881.1        | Cellular process        | Non-Virulent        |
| 14             | WP_001295493.1        | Metabolism Molecule     | Non-Virulent        |
| 15             | WP_000691930.1        | Cellular process        | Virulent            |
| 16             | WP_000597196.1        | Metabolism Molecule     | Virulent            |
| 17             | WP_000248636.1        | Metabolism Molecule     | Non-Virulent        |
| 18             | WP_000755956.1        | Metabolism Molecule     | Non-Virulent        |
| 19             | WP_001237866.1        | Cellular process        | Virulent            |
| 20             | WP_000454701.1        | Metabolism Molecule     | Non-Virulent        |
| 21             | WP_000003197.1        | Cellular process        | Virulent            |
| 22             | WP_005049020.1        | Cellular process        | Non-Virulent        |
| 23             | WP_048814497.1        | Cellular process        | Virulent            |
| 24             | WP_000301054.1        | Metabolism Molecule     | Non-Virulent        |
| 25             | WP_000266171.1        | Metabolism Molecule     | Non-Virulent        |
| 26             | WP_000589825.1        | Cellular process        | Virulent            |
| 27             | WP_005051685.1        | Cellular process        | Virulent            |
| 28             | WP_001387238.1        | Cellular process        | Virulent            |
| 29             | WP_000248097.1        | Cellular process        | Virulent            |
| 30             | WP_000848528.1        | Cellular process        | Virulent            |
| 31             | WP_000189314.1        | Cellular process        | Virulent            |
| 32             | WP_001297375.1        | Metabolism Molecule     | Non-Virulent        |
| 33             | WP_000858193.1        | Cellular process        | Non-Virulent        |
| 34             | WP_001296791.1        | Cellular process        | Virulent            |
| 35             | WP_000778795.1        | Cellular process        | Virulent            |

|    |                |                  |              |
|----|----------------|------------------|--------------|
| 36 | WP_001205243.1 | Cellular process | Non-Virulent |
| 37 | WP_001238362.1 | Cellular process | Non-Virulent |
| 38 | WP_000943980.1 | Cellular process | Non-Virulent |
| 39 | WP_000132640.1 | Cellular process | Non-Virulent |
